# MicroRNA arm switching regulated by uridylation

Haedong Kim<sup>1,2,4</sup>, Jimi Kim<sup>1,4</sup>, Sha Yu<sup>1</sup>, Young-Yoon Lee<sup>1,2</sup>,  
Junseong Park<sup>3</sup>, Ran Joo Choi<sup>3</sup>, Seon-Jin Yoon<sup>3</sup>, Seok-Gu Kang<sup>3</sup>, and  
V. Narry Kim<sup>1,2,5\*</sup>

<sup>1</sup>Center for RNA Research, Institute for Basic Science, Seoul 08826, Korea

<sup>2</sup>School of Biological Sciences, Seoul National University, Seoul 08826, Korea

<sup>3</sup>Department of Neurosurgery, Brain Tumor Center, Severance Hospital,  
Yonsei University College of Medicine, Seoul 03722, Korea

<sup>4</sup>These authors contributed equally

<sup>5</sup>Lead Contact

\*Correspondence: [narrykim@snu.ac.kr](mailto:narrykim@snu.ac.kr)

## SUMMARY

Strand selection is a critical step in microRNA (miRNA) biogenesis. Although the dominant strand may alter depending on cellular contexts, the molecular mechanism and physiological significance of such alternative strand selection (or “arm switching”) remain elusive. Here we find mir-324 as one of the strongly regulated miRNAs by arm switching, and identify terminal uridylyl transferases TUT4 and TUT7 as the key regulators. Uridylation of pre-mir-324 by TUT4/7 re-positions DICER on the pre-miRNA and shifts the cleavage site. This alternative processing produces a duplex with a different terminus, from which the 3' strand (3p) is selected instead of the 5' strand (5p). In glioblastoma, the TUT4/7 and 3p levels are upregulated while the 5p level is reduced. Manipulation of the strand ratio is sufficient to impair glioblastoma cell proliferation. This study uncovers a role of uridylation as a molecular switch in alternative strand selection and implicates its therapeutic potential.

1  
2  
3  
4  
5  
6  
7  
8  
9  
10  
11  
12  
13  
14  
15

## MicroRNA arm switching regulated by uridylation

---

### Keywords

16

miRNA, miRNA biogenesis, arm switching, strand selection, miRNA  
tailing, uridylation, TUTase, DICER, miR-324, glioblastoma

17

18

## INTRODUCTION

19

MicroRNA (miRNA) serves as a guide molecule in RNA silencing through sequence-specific pairing with the targets. Because the miRNA sequence is embedded in the duplex region of its precursor, the guide strand should be selected from the duplex correctly to ensure the functionality (Khvorova et al., 2003; Schwarz et al., 2003). It was initially assumed that only one strand is dominantly chosen as a mature miRNA. However, the strand ratios of some miRNAs alter depending on the tissues, developmental stages, and pathological conditions (Chen et al., 2018; Chiang et al., 2010; Ro et al., 2007; Tsai et al., 2016; Zhang et al., 2019). These observations implicated there may be an active mechanism that controls alternative strand selection. However, the molecular principle underlying such “arm switching” remains to be elucidated.

The miRNA duplex is generated by consecutive actions of two RNase III enzymes. The nuclear RNase III DROSHA initiates miRNA maturation by processing the primary transcript (pri-miRNA). Together with its cofactor DGCR8, DROSHA forms a complex known as the Microprocessor that recognizes multiple sequence and structural motifs of pri-miRNA for precise cleavage (Denli et al., 2004; Gregory et al., 2004; Han et al., 2004; Lee et al., 2003). DROSHA introduces a staggered cut, liberating a small hairpin of ~65 nt with a 2-nt 3' overhang (called pre-miRNA). Following pre-miRNA export to the cytoplasm, DICER recognizes the 2-nt 3' overhang on pre-miRNA using its platform and PAZ domains (Liu et al., 2018; Macrae et al., 2006; Tian et al., 2014). DICER acts like a molecular ruler that measures 22 nt from either the 5' or 3' end to determine the cleavage site on pre-miRNA (MacRae et al., 2007; Macrae et al., 2006; Park et al., 2011; Zhang et al., 2002). Pre-miRNA with a relatively unstable 5' end (e.g., mismatch, G–U, or A–U pair) would be readily captured by the 5' pocket (in the platform domain) of DICER and the cleavage site is dictated by the distance from

## MicroRNA arm switching regulated by uridylation

---

the 5' end ("5'-counting rule") (Park et al., 2011; Tian et al., 2014). On the other hand, pre-miRNA with a stable 5' end (e.g., G–C pair) relies on the interaction between its 3' end and the 3' pocket (in the PAZ domain) of DICER and is cleaved at the site ~22 nt away from its 3' end ("3'-counting rule") (MacRae et al., 2007; Macrae et al., 2006; Park et al., 2011). The cleavage product is a ~22-nt duplex with 2-nt 3' overhangs at both ends, which is subsequently loaded onto an Argonaute (AGO) protein with the help from HSC70/HSP90 chaperone machinery (Iwasaki et al., 2010; Naruse et al., 2018). One strand ("guide") remains in the AGO to direct gene silencing while the other strand ("passenger") is expelled and degraded (Khvorova et al., 2003; Schwarz et al., 2003). The "seed" sequence (2–7 nucleotides relative to the 5' end) of the guide strand is critical for target recognition (Bartel, 2018).

Alternative maturation of miRNA (such as processing by DROSHA/DICER at alternative sites) can yield multiple isoforms (called isomiRs) from the same hairpin and adds another layer of complexity to the control of gene expression. IsomiRs with distinct 5' ends (5'-isomiRs) are of particular importance as the change at the 5' end shifts the seed region and, therefore, has a significant impact on target specificity (Chiang et al., 2010; Fukunaga et al., 2012; Tan et al., 2014). The 5' end heterogeneity can also alter the terminal properties of miRNA duplex and thus influence strand selection (Lee and Doudna, 2012; Wilson et al., 2015; Wu et al., 2009).

Strand selection is mainly determined by two rules involving thermodynamic characteristics and 5' nucleotide identity of a miRNA duplex. The crystal structures of human AGO and its homologues have highlighted a key role of a basic pocket of the MID domain that interacts with the mono-phosphorylated 5' end of the guide strand (Elkayam et al., 2012; Ma et al., 2005; Parker et al., 2005; Schirle and MacRae, 2012). Thermodynamically unstable 5' ends would be more readily accessible to the pocket, leading to the preference for unstable 5' ends by AGO (Khvorova et al., 2003; Schwarz et al., 2003). Furthermore, analyses of

## MicroRNA arm switching regulated by uridylation

---

miRNA sequences indicated that there is a clear bias for U or A at the 5' terminal position (Ghildiyal et al., 2010; Lau et al., 2001). The human AGO MID domain preferentially interacts with UMP or AMP but discriminates against CMP and GMP (Frank et al., 2010). Therefore, a strand with low thermodynamic stability and/or A/U at the 5' end is favorably selected by AGO (Suzuki et al., 2015).

Despite these two rules, alternative strand selection or “arm switching” seems to take place considerably for certain miRNAs in a context-dependent manner (Chen et al., 2018; Chiang et al., 2010; Ro et al., 2007). For instance, miR-155-5p and miR-155-3p have opposite effects on type I interferon production (Alivernini et al., 2017), and the strand ratio of miR-155 changes throughout the activation stages of dendritic cells (Zhou et al., 2010). Arm switching has also been suggested as one of the miRNA diversification mechanisms during evolution (de Wit et al., 2009; Griffiths-Jones et al., 2011). Arm switching leads to accumulation of mature miRNAs with completely different seed sequences and, as a consequence, drastically changes the target repertoire of the miRNA gene. Therefore, unraveling the molecular mechanism of arm switching would be important to understand miRNA biogenesis regulation and the regulatory roles of miRNAs. However, it remains to be investigated if arm switching is indeed an active process, and if so, how it is regulated mechanistically.

In this study, we aimed to identify miRNAs that undergo conserved arm switching and uncover its molecular mechanism. We find that miR-324 is the most prominently regulated miRNA through arm switching and that the arm switching is actively controlled by uridylation enzymes.

## RESULTS

### Arm switching of miR-324

In order to gain molecular insights into miRNA arm switching, we first searched for miRNAs that exhibit significant alterations in their strand

## MicroRNA arm switching regulated by uridylation

---

ratio. For accurate quantification of strand ratio, we employed the recently optimized protocol called AQ-seq that minimizes ligation bias in small RNA-seq (sRNA-seq) library construction (Kim et al., 2019). The variation of strand selection was estimated across 15 different mouse tissues/developmental stages (Figure 1A, median absolute deviation of the fraction of the 5p strand for each given miRNA hairpin). We also used a sRNA-seq dataset from 9 human cell lines to examine strand usage in humans (Figure S1A) (Mayr and Bartel, 2009). In both human and mouse datasets, the majority of miRNAs are invariable in strand ratio (~86%, median variance below 3%), indicating that not every miRNA is subjected to arm switching. Nevertheless, we identified several intriguing cases unambiguously displaying substantial variations, such as miR-324, miR-362, miR-193a, and miR-140.

miR-324 exhibits prominent arm switching in both human and mouse (Figures 1A–C and S1A–B). It was previously shown that miR-324-5p is downregulated in hepatocellular carcinoma and glioblastoma and suppresses cell proliferation and invasion (Cao et al., 2015; Zhi et al., 2017). In contrast, miR-324-3p is upregulated in hepatocellular carcinoma and promotes cell proliferation (Tuo et al., 2017; Xiao et al., 2017). These findings collectively suggest that two strands from the miR-324 hairpin may have distinct, possibly opposing, functions. Thus, the arm switching of miR-324 may have a substantial impact on cellular fate decision.

Notably, we detected three different groups of 5'-isomiRs (5p, 3p.1, and 3p.2) that are produced from the single MIR324 locus (Figure 1B). The 5p strand is dominant in mouse embryos and neuronal tissues while the major 3p isoform (3p.1) is prevalent in liver and stomach (Fig. 1C). The 5'-isomiRs have distinct seed sequences and, consequently, bind to different targets according to the miRNA-target interactome data (Figure S1C) (Helwak et al., 2013; Moore et al., 2015). Moreover, the 5'-isomiR groups are found across mammals, suggesting that the mechanism for alternative maturation is conserved evolutionarily (Figures 1D and S1D).

## MicroRNA arm switching regulated by uridylation

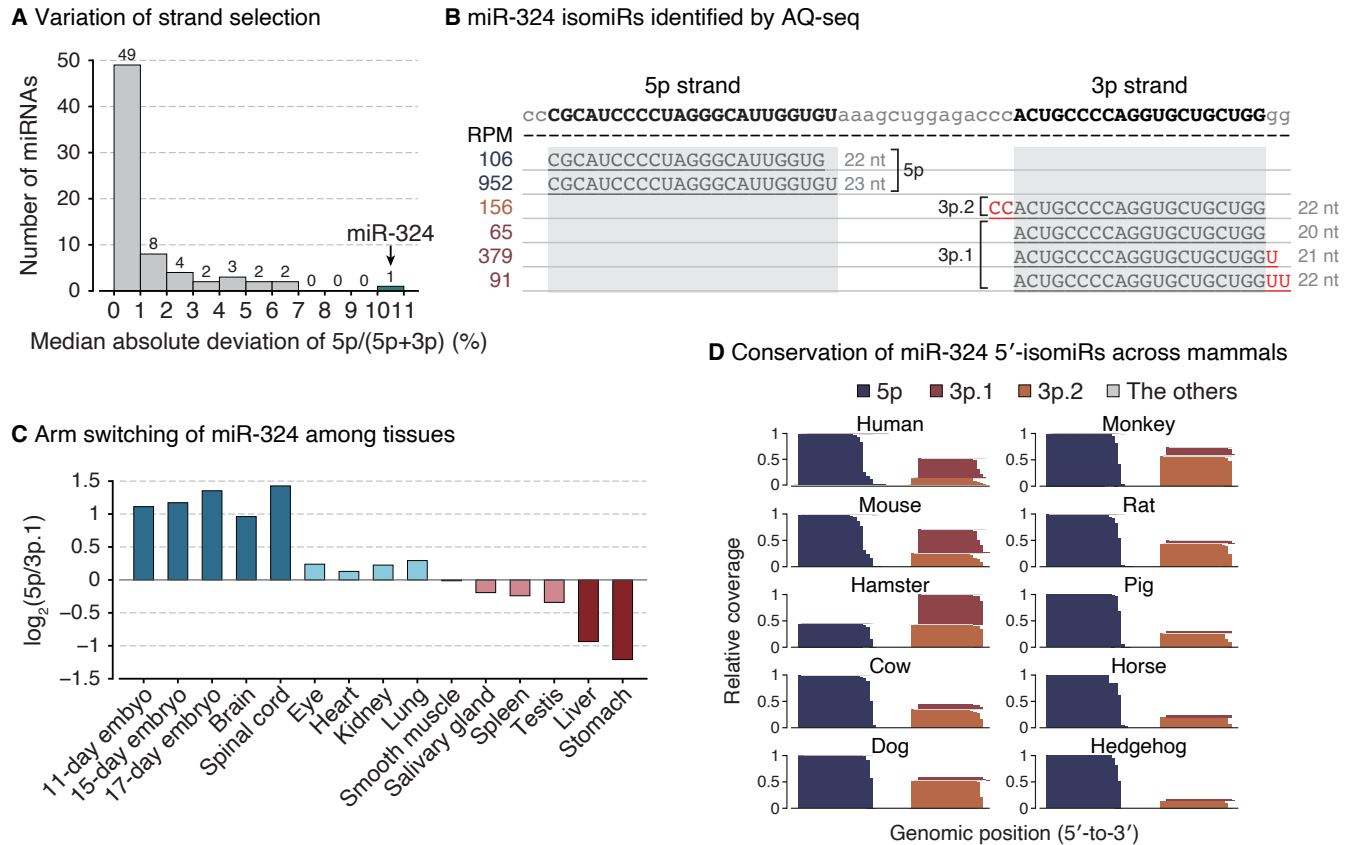

### Figure 1 | Arm switching of miR-324.

**(A)** Median absolute deviation of the 5p proportion for a given miRNA in mouse tissues. Abundant and ubiquitous miRNAs (> 100 median RPM in both mouse tissue and human cell line datasets, > 0 RPM in all samples) were included in this analysis. **(B)** IsomiR profiles of miR-324 in HEK293T, uncovered by AQ-seq. RPM-normalized read counts are denoted on the left. Reference sequences of 5p and 3p are marked by grey shade. **(C)** Strand ratios (5p/3p.1) of miR-324 for the indicated panel of mouse tissues as measured by AQ-seq. **(D)** Conservation of the 5'-isomiRs of miR-324 in mammals. sRNA-seq reads of human, monkey, mouse, rat, hamster, cow, and horse were obtained from miRBase release 22 (Kozomara et al., 2019). For the other species, sRNA-seq reads were obtained from MirGeneDB release 2.0 (Fromm et al., 2019). RPM, reads per million. See also Figure S1.

### miR-324 arm switching is controlled by TUT4 and TUT7

144

To understand the underlying mechanism for alternative strand usage, we examined sRNA-seq (AQ-seq) data because the reads may reflect the maturation processes of miRNAs, including 3' end modifications and alternative processing events (Kim et al., 2019). Intriguingly, 3p.1 is highly uridylated (~88% of 3p.1 reads) (Figure 1B). The uridylation frequency of 3p correlates negatively with the 5p/3p.1 ratio (Figure 2A). These observations led us to hypothesize that uridylation may be involved in the arm switching.

Terminal uridylyl transferases TUT4 (also known as ZCCHC11 and TENT3A) and TUT7 (also known as ZCCHC6 and TENT3B) catalyze uridylation of diverse RNA species including a specific set of pre-miRNAs (e.g., *let-7* precursors) (Hagan et al., 2009; Heo et al., 2012; Heo et al., 2009; Liu et al., 2014; Thornton et al., 2012). TUT4 and TUT7 (TUT4/7) act redundantly on most substrates (Heo et al., 2012; Labno et al., 2016; Le Pen et al., 2018; Lim et al., 2014; Pirouz et al., 2019; Thornton et al., 2012; Warkocki et al., 2018). We quantified TUT4/7 levels in mouse tissues by RT-qPCR and found that the 5p/3p.1 ratio is higher in cell types where the TUT4 and TUT7 levels are relatively low (Figure 2B). To test the involvement of TUT4/7 in miR-324 maturation, we depleted TUT4/7 in HEK293T cells and performed sRNA-seq (AQ-seq) (Kim et al., 2019). TUT4/7 knockdown reduced uridylation of miRNAs including miR-324-3p (Figure 2C, first panel). Importantly, TUT4/7 knockdown resulted in a change in isoform composition of miR-324, with a reduction of 3p.1 and an increase of 5p and the minor isoform 3p.2. Consequently, the ratio between the major isoforms (5p/3p.1) increased (Figure 2C, second–fourth panels). These sequencing data were consistent with the northern blot (Figures 2D and S2A) and RT-qPCR results (Figure S2B), which confirmed alterations in the abundance of miR-324 isoforms upon TUT4/7 knockdown.

Moreover, re-analysis of the published sRNA-seq data from the *Tut4/7* double knockout mice shows that the 3p.1 level decreases while



## MicroRNA arm switching regulated by uridylation

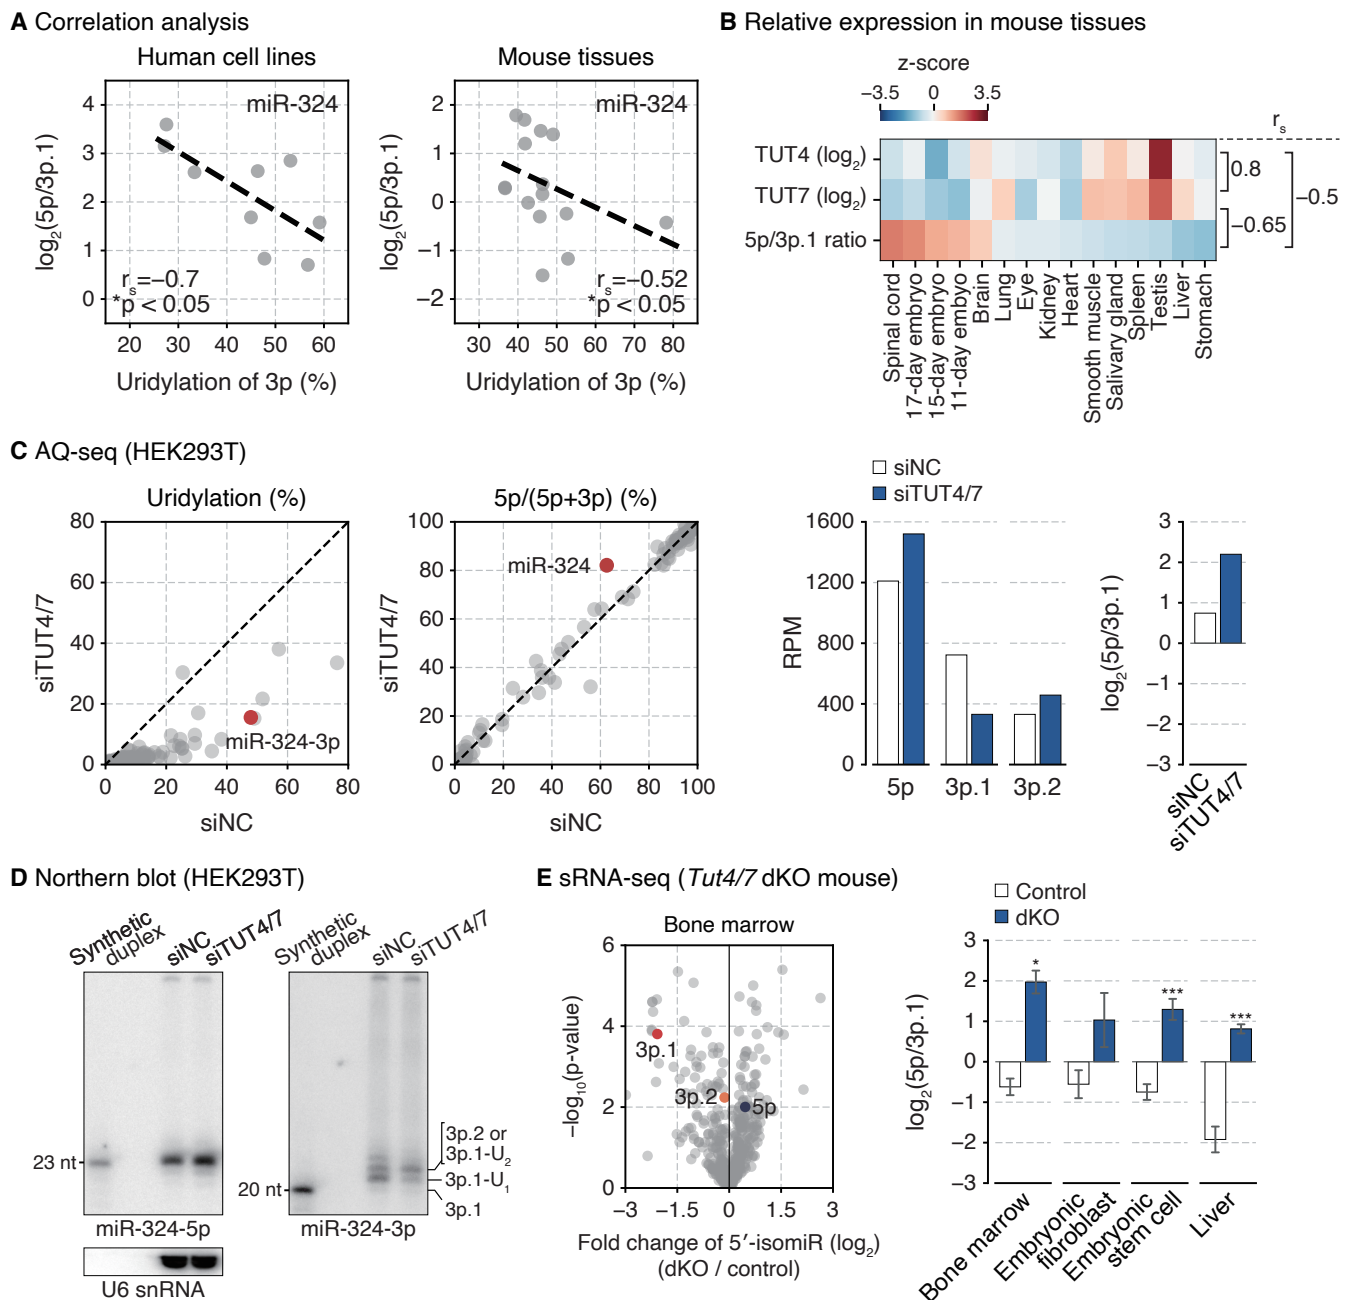

**Figure 2 | miR-324 arm switching is controlled by TUT4 and TUT7.**

**(A)** Negative association between the uridylation frequency of miR-324-3p and the 5p/3p.1 ratio of miR-324 in nine human cell lines and fifteen mouse tissues. The linear regression is shown with dashed lines.  $r_s$ , Spearman correlation coefficient.  $*p < 0.05$  by the two-sided test. **(B)** The relative TUT4/7 levels and the 5p/3p.1 ratios of miR-324 in the indicated panel of mouse tissues. The TUT4/7 mRNA levels and 5p/3p.1 ratios were quantified by RT-qPCR and AQ-seq, respectively.  $r_s$ , Spearman correlation coefficient. (continued on the next page)

## MicroRNA arm switching regulated by uridylation

---

**Figure 2** (*previous page*) | **(C)** AQ-seq following knockdown of TUT4/7 in HEK293T. First and second panels: Scatter plots of uridylation frequency and the 5p proportion of miRNAs. Abundant miRNAs (> 100 RPM) in the siNC-transfected sample were included in the analysis. Third and fourth panels: Relative abundance of three 5'-isomiRs and log<sub>2</sub>-transformed 5p/3p.1 ratio of miR-324. **(D)** Northern blot of miR-324-5p and miR-324-3p in HEK293T. Synthetic miR-324 duplex composed of 23 nt-long 5p and 20 nt-long 3p.1 was used for size references. U6 snRNA was detected as a loading control. The same blot was probed for all the results. **(E)** sRNA-seq following double knockout of *Tut4/7* in mice. Left: A volcano plot showing abundance changes of 5'-isomiRs by TUT4/7 depletion in bone marrow. 5'-isomiRs with RPM over 10 in the control samples were included in this analysis. P-value by the two-sided Student's *t* test. Right: log<sub>2</sub>-transformed 5p/3p.1 ratio of miR-324. Bars indicate mean ± s.d.. Bone marrow, n = 2; embryonic fibroblast, n = 2; embryonic stem cell, n = 3; control and *Tut4/7* dKO in liver, n = 4 and 3, respectively. \*p < 0.05, \*\*\*p < 0.001 by the two-sided Student's *t* test. RPM, reads per million. See also Figure S2.

5p increases in the knockout (Figures 2E, left panel, and S2C) (Morgan 176  
et al., 2017). Consequently, a dramatic change in the strand ratio was 177  
observed in all tissues/cell types examined (bone marrow, embryonic 178  
fibroblasts, embryonic stem cells, and liver) (Figures 2E, right panel). 179  
Together, the results demonstrate that TUT4/7 actively regulate miR-324 180  
isoform selection in favor of 3p.1. 181

Of note, we noticed that the residual 3p.1 reads in the knockout 182  
samples are mostly adenylated at the 3' end (Figure S2D). This may be 183  
attributed to the activity of terminal adenylyltransferase TENT2 (also 184  
known as PAPD4, GLD2, and TUT2) that we have previously shown to 185  
play a complementing role in TUT4/7-depleted cells, assisting the 186  
processing of group II pre-*let-7* family (Heo et al., 2012). 187

### Uridylation leads to alternative DICER processing of pre-miR-324 188

We next sought to understand mechanistically how TUT4/7 modulate 189  
the miR-324 strand selection. TUT4/7 are known to modify pre-miRNAs 190  
rather than mature miRNAs (Chiang et al., 2010; Kim et al., 2019; Liu et 191  
al., 2014). Thus, we interrogated the effect of uridylation on pre-miRNA 192  
processing by performing *in vitro* DICER processing assays with 193  
synthetic pre-miR-324. Remarkably, when pre-miR-324 carries one or 194  
two extra uridine residues at the 3' end, the DICER processing site is 195

## MicroRNA arm switching regulated by uridylation

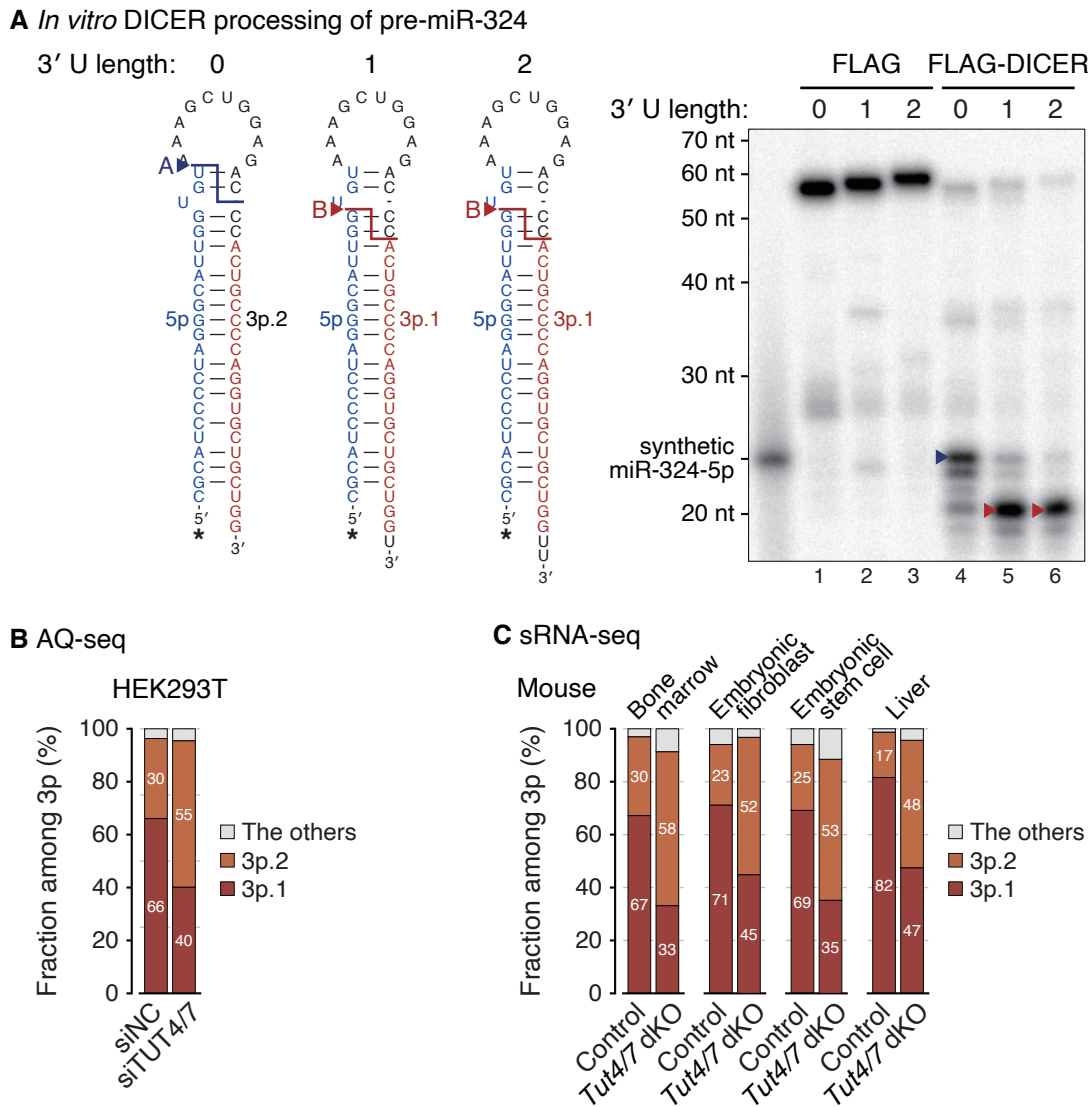

### Figure 3 | Uridylation leads to alternative DICER processing of pre-miR-324.

**(A)** *In vitro* processing of unmodified, mono- or di-uridylated forms of pre-miR-324 by immunopurified DICER. Synthetic miR-324-5p (23 nt) marked in blue was used as a size control. Major cleavage products and their corresponding cleavage sites are marked with arrowheads. \*, radiolabeled 5' phosphates. **(B)** 5'-isomiR composition of miR-324-3p in HEK293T. **(C)** 5'-isomiR composition of miR-324-3p in mice. Bars indicate mean (bone marrow, n = 2; embryonic fibroblast, n = 2; embryonic stem cell, n = 3; control and *Tut4/7* dKO in liver, n = 4 and 3, respectively). See also Figure S3.

## MicroRNA arm switching regulated by uridylation

---

shifted by 3 nt (Figure 3A, from position A to position B). Unmodified pre-miR-324 mainly releases a longer duplex containing 5p and 3p.2 (Figure 3A, blue arrowheads) while uridylated pre-miR-324 is cleaved at the alternative position B, yielding a shorter duplex composed of shorter 5p and 3p.1 (Figure 3A, red arrowheads). Thus, TUT4/7-mediated uridylation of pre-miR-324 leads to alternative DICER processing. Consistent with this *in vitro* assay, the sequencing data from TUT4/7-depleted human and mouse cells showed that the relative abundance of the 3p isomiRs (3p.1 vs. 3p.2) changed upon TUT4/7 knockdown (Figures 2C, third panel, and 3B) and knockout (Figure 3C), corroborating the conclusion that uridylation alters DICER cleavage site selection.

It was surprising to observe that uridylation of pre-miR-324 induced the 3-nt shift of the DICER processing site because pre-miR-324 has a terminal C–U mismatch and, hence, is predicted to follow the 5'-counting rule. According to the 5'-counting rule, cleavage site is dictated by the distance from the 5' end and should not be affected by 3' terminal uridylation (Figure S3) (Park et al., 2011). Therefore, this raised new questions concerning the DICER processing mechanism: (1) What causes the abrupt 3-nt shift in pre-miR-324 processing upon uridylation? (2) How do the established 5'- and 3'-counting rules apply to pre-miR-324 processing?

### **Alternative DICER processing is facilitated by the double-stranded RNA binding domain (dsRBD)**

We first investigated the determinant(s) responsible for the 3-nt shift. Structural modeling of human DICER in complex with pre-miR-324 suggested that the asymmetric U bulge near the cleavage site may cause steric hindrance against the RNase IIIb domain if the catalytic center of DICER is placed 1 nt away from the original cleavage site (Figure S4A) (Liu et al., 2018). To find out if the U bulge serves as an anti-determinant for cleavage at the neighboring position, we removed

## MicroRNA arm switching regulated by uridylation

---

the bulge from pre-miR-324. For the “no-bulge” mutant, DICER no longer induced the abrupt shift to position B upon uridylation, but rather causing single-nucleotide gradual shifts (Figure 4A, lanes 10–12). Thus, the U bulge is an anti-determinant for cleavage at sites between positions A and B and thereby serves as the *cis*-acting element responsible for the unexpected 3-nt shift to position B.

Next, to reveal how the 5'- and 3'-counting rules relate to pre-miR-324 processing, we utilized the DICER mutants in either the 5' or 3' pocket (Figure S4A) (Park et al., 2011). The 5' pocket mutant DICER was severely impaired in cleaving pre-miR-324 at position A while the 3' pocket mutant was only slightly affected in processing efficiency without an impact on cleavage site choice (Figure 4B). This result demonstrates the importance of the 5' pocket for the cleavage at position A. Consistently, when the 5' pocket mutant DICER was ectopically expressed in *Dicer*-null cells, it produced less miR-324-3p.2 (originating from position A) than the wild type DICER did, indicating that the 5' pocket of DICER is required for cleavage at position A in cells (Figure S4B, blue arrowheads) (Park et al., 2011). In contrast, the cleavage at position B was not affected substantially by the 5' pocket mutation (Figure S4B, red arrowheads). Thus, the cleavage at position A is indeed dictated by the 5' pocket. However, if the 5' pocket is the only determinant, how does 3' uridylation lead to the shift to position B? Our results implicated that there must be a yet-unknown mechanism that contributes to DICER cleavage site selection.

This led us to investigate the contribution of other domains in DICER. We recently discovered that DROSHA uses the double-stranded RNA binding domain (dsRBD) to recognize a motif near the cleavage site to achieve precise processing (Fang and Bartel, 2015; Kwon et al., 2019). DROSHA has a similar overall structure to DICER, which suggests a common evolutionary origin of metazoan RNase III proteins (Kwon et al., 2016). To test the role of the DICER dsRBD *in vitro*, we generated a dsRBD-deletion mutant. Since the dsRBD is connected to the RNase

## MicroRNA arm switching regulated by uridylation

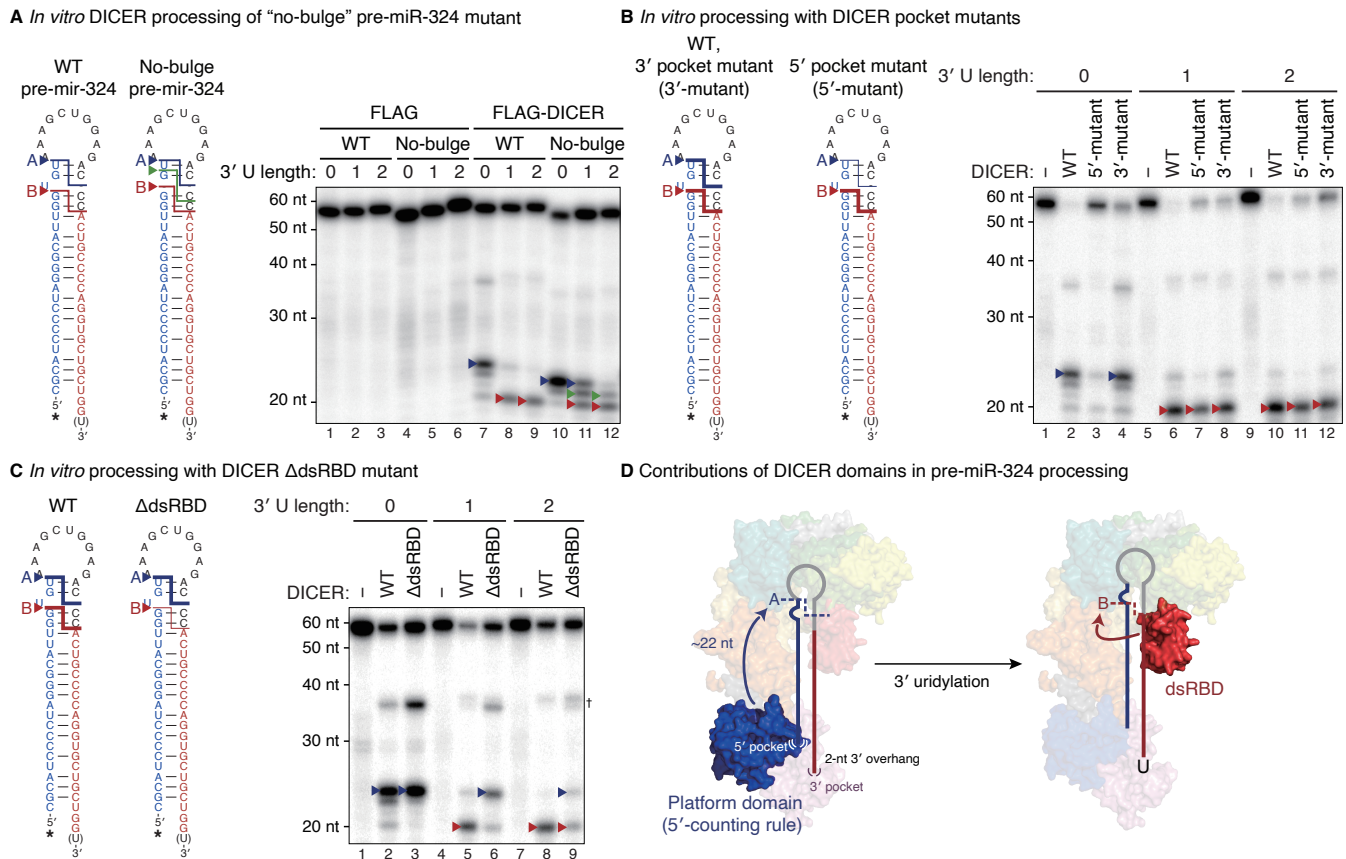

**Figure 4 | Alternative DICER processing is facilitated by the dsRBD.**

**(A)** *In vitro* processing of unmodified, mono- or di-uridylated forms of wild type or no-bulge mutant pre-miR-324 by immunopurified DICER. **(B–C)** *In vitro* processing of unmodified, mono- or di-uridylated forms of pre-miR-324 by immunopurified DICER pocket mutants (B) or dsRBD-deleted mutant (C). Major cleavage products and their corresponding cleavage sites are marked with arrowheads. \*, radiolabeled 5' phosphates. †, nicked products at the 3p positions. **(D)** A proposed model for the uridylation-mediated alternative DICER processing of pre-miR-324. See also Figure S4.



## MicroRNA arm switching regulated by uridylation

---

IIIb domain via a flexible linker, the deletion is unlikely to alter the overall 259  
DICER conformation (Figure S4A). Intriguingly, the dsRBD deletion 260  
resulted in a significant change in the processing pattern (Figure 4C). 261  
Without the dsRBD, DICER cleaved mainly at position A, which indicates 262  
the dsRBD is responsible for the cleavage at position B. This result 263  
reveals a previously unappreciated role of the DICER dsRBD in 264  
cleavage site selection. Of note, the DICER-interacting partner, TRBP, 265  
has no impact on the uridylation-mediated alternative processing (Figure 266  
S4C, lanes 13–18). 267

Taken together, unmodified pre-miR-324 is cleaved by DICER at 268  
position A relying on the 5' pocket in the platform domain (Figure 4D, left 269  
panel). However, when uridylated, the end structure (3–4 nt 3' overhang) 270  
is unfit to be accommodated tightly by the platform/PAZ domains so that 271  
pre-miR-324 is repositioned in DICER with the help of the dsRBD, 272  
resulting in alternative processing at position B (Figure 4D, right panel). 273

### **Alternative DICER processing leads to arm switching** 274

Our results showed that pre-miR-324 can yield two alternative forms 275  
of duplexes: a long duplex (position A; 5p/3p.2) and a short duplex 276  
(position B; 5p/3p.1) (Figure 5A). Does this alternative processing lead 277  
to alternative strand selection? To examine strand selection in cells, we 278  
constructed reporters that contain the 3' UTR complementary to either 279  
miR-324-5p or miR-324-3p.1 (Figure 5B, left panel). Synthetic duplexes 280  
(either the long duplex (5p/3p.2) or the short duplex (short 5p/3p.1)) 281  
were co-transfected with the reporters. The long duplex selectively 282  
repressed the reporter with the 5p complementary sites but not that with 283  
3p.1 sites, confirming the production of 5p from the long duplex. 284  
Importantly, the short duplex downregulated the 3p.1 reporter but not the 285  
5p reporter (Figure 5B, right panel). Accordingly, the long and short 286  
duplexes suppressed distinct predicted targets of 5p and 3p.1, 287  
respectively (Figures 5C and S5A–B) (Agarwal et al., 2015). These 288  
results show that 5p and 3p.1 are indeed differentially produced from the 289





## MicroRNA arm switching regulated by uridylation

---

### **Figure 5 | Alternative DICER processing leads to arm switching.** (*previous page*)

**(A)** A schematic diagram of strand selection of miR-324 duplexes produced from unmodified and uridylated pre-miR-324. Dashed rectangles indicate end properties that dictate the strand selection of each duplex. **(B)** Luciferase reporter assay with two miR-324 duplexes. Left: An illustration of firefly reporter mRNAs that have three 8mer target sites of either miR-324-5p or 3p.1. Right: The relative reporter activity from the firefly luciferase in response to two miR-324 duplexes in HEK293T. The reporter activity from Renilla luciferase was used as a control. Bars indicate mean  $\pm$  s.d. ( $n = 2$ , biological replicates).  $**p < 0.01$  by the two-sided Student's  $t$  test. **(C)** Cumulative distribution of changes in abundance of miR-324 targets after transfection of miR-324 duplexes in A172. Target genes were predicted by TargetScan (Agarwal et al., 2015). P-value by the one-sided Kolmogorov–Smirnov test. See also Figure S5.

long duplex and the short duplex, respectively. Retrospective analysis of 290  
sRNA-seq data using the 5' pocket mutant DICER also revealed that 291  
when the long duplex production is disturbed, the 5p/3p.1 ratio 292  
decreases (Figure S5C). 293

This conforms well to the established strand selection rules. From the 294  
long duplex, the 5p strand is selected because the 5' end of 5p is 295  
thermodynamically unstable compared to that of 3p.2 (Figure 5A, blue 296  
dashed rectangle). However, in the short duplex, 3p.1 starts with a 5' 297  
adenosine which is favored by AGO (Figure 5A, red dashed rectangle). 298  
Taken together, the results demonstrate that alternative processing 299  
results in arm switching of miR-324. 300

### **Alteration of the miR-324 strand ratio affects cell cycle progression** 301

It was previously reported that the 5' end of miR-324-3p varies in 302  
human glioblastoma (GBM) (Skalsky and Cullen, 2011). The proportion 303  
of 3p.1 is substantially greater in tumor than in normal brain tissue 304  
(Figure 6A). To examine the possibility that TUT4/7-mediated miR-324 305  
maturation is differentially modulated in the GBM context, we analyzed 306  
publicly available transcriptome datasets. Both TUT4 and TUT7 are 307  
significantly upregulated in GBM (Figures 6B and S6A) (Lee and Choi, 308  
2017; Madhavan et al., 2009). Using an independent dataset that 309  
profiled both mRNAs and miRNAs (Gulluoglu et al., 2018), we confirmed 310

## MicroRNA arm switching regulated by uridylation

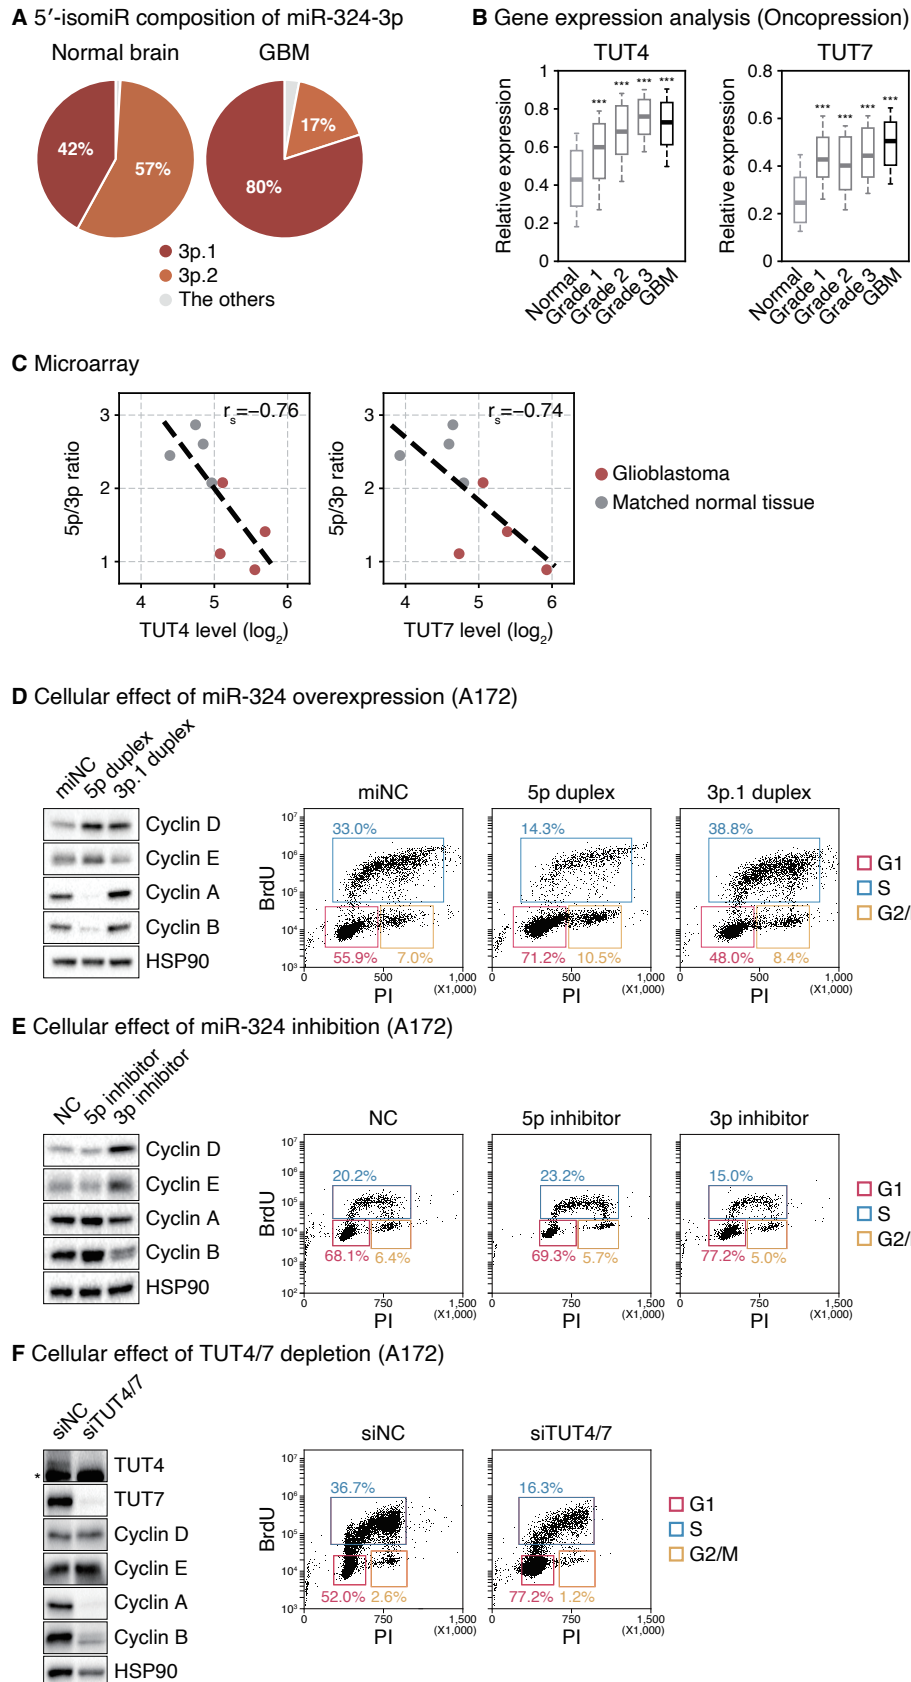

## MicroRNA arm switching regulated by uridylation

---

### Figure 6 | Alteration of the miR-324 strand ratio affects cell cycle progression. (*previous page*)

**(A)** 5'-isomiR composition of miR-324-3p in glioblastoma and normal brain tissues (Skalsky and Cullen, 2011). Normal brain, n = 3; glioblastoma, n = 6. **(B)** Expression levels of TUT4/7 in normal, lower grade glioma, and glioblastoma tissues from the Oncopression database. Normal, n = 723; grade 1, n = 74; grade 2, n = 133; grade 3, n = 132; glioblastoma, n = 865. \*\*\*p < 0.001 by one-way ANOVA with Tukey's post hoc test for multiple comparisons. **(C)** Negative correlation between the TUT4/7 expression level and the miR-324-5p/3p ratio in glioblastoma (red) and matched normal brain tissues (grey) (Gulluoglu et al., 2018). The linear regression is shown with dashed lines.  $r_s$ , Spearman correlation coefficient. **(D)** Western blot of indicated cyclin proteins and cell cycle profile after overexpressing synthetic 5p duplex (long duplex) or 3p.1 duplex (short duplex) of miR-324 in A172 cells. **(E)** Western blot of indicated cyclin proteins and cell cycle profile after inhibiting miR-324 by locked nucleic acid antisense oligonucleotides in A172 cells. **(F)** Western blot of indicated proteins and cell cycle profile after knocking down TUT4/7 in A172 cells. \*, a cross-reacting band. PI, propidium iodide. BrdU, bromodeoxyuridine. See also Figure S6.

the upregulation of TUT4/7 levels in GBM and observed the reduction of  
the miR-324-5p/3p ratio in GBM compared to the matched normal  
samples (Figures 6C and S6B). It is noteworthy that TUT4/7 levels  
negatively correlate with 5p/3p ratios (Figure 6C). Moreover, GBM  
patients with low 5p/3p ratios exhibited poor prognosis (Figure S6C).  
These data collectively suggest that the TUT4/7-mediated miR-324  
regulation may be physiologically relevant in GBM.

To understand the function of miR-324 arm switching, we investigated  
the molecular and cellular phenotypes driven by perturbation of the  
miR-324 strand selection in GBM cell lines. Given the previous studies  
showing functions of the miR-324 strands in cell proliferation in  
hepatocellular carcinoma (Cao et al., 2015; Tuo et al., 2017; Xiao et al.,  
2017), we examined the cell cycle. Transfection of the synthetic long  
duplex ("5p duplex") or an antisense oligo against 3p ("3p inhibitor")  
resulted in the dysregulation of several cyclin proteins; an accumulation  
of cyclins D and E and a reduction of cyclins A and B were observed  
(Figures 6D and 6E, left panels). Accordingly, cell cycle profiling  
indicated the cells are arrested at the G1 phase (Figures 6D and 6E,  
right panels). These molecular changes and cellular phenotypes were  
also observed with combinatorial treatment of the 5p duplex and the 3p

## MicroRNA arm switching regulated by uridylation

---

inhibitor (Figures S6D and S6E). These observations are in line with previous studies where miR-324-5p reduces brain tumor growth in cultured cells and *in vivo* and that its downregulation in glioblastoma is associated with poor prognosis (Ferretti et al., 2008; Zhi et al., 2017). Lastly, TUT4/7 knockdown gave rise to cyclin dysregulation and G1 arrest in GBM cell lines (Figures 6F and S6F) and reduced cell viability in patient-derived GBM tumorsphere culture (Figure S6G). Together, these results indicate that miR-324 isomiRs have opposing functions in GBM cell proliferation.

## DISCUSSION

We learned from this study that approximately 14% of miRNAs examined undergo arm switching (Figure 1A). We further found that arm switching is an actively regulated process with defined *trans*-acting and *cis*-acting elements, at least in the case of miR-324 (Figure 7). In this pathway, TUT4/7 function as the key players by uridylating pre-miR-324. When modified, pre-miR-324 is cleaved at an alternative site by DICER, yielding a shorter duplex with a different end property. The shorter duplex is loaded onto AGO in an inverted orientation such that 3p.1 is selected instead of 5p. As the TUT4/7 levels are under a tissue/developmental stage-specific regulation, the arm ratio of miR-324 changes accordingly. TUT4/7 are also modulated under pathological conditions such as in glioblastoma, resulting in misregulation of miR-324.

TUT4/7 uridylate many different RNA species including miRNAs, histone mRNAs, deadenylated mRNAs, viral RNAs, retrotransposon RNAs, rRNAs, vault RNAs, and Y RNAs (Hagan et al., 2009; Heo et al., 2012; Heo et al., 2009; Kim et al., 2015; Labno et al., 2016; Lackey et al., 2016; Le Pen et al., 2018; Lim et al., 2014; Pirouz et al., 2019; Thornton et al., 2012; Warkocki et al., 2018). Oligo-uridine tail recruits the 3'-5' exoribonuclease DIS3L2 and thereby induces decay (Chang et

## MicroRNA arm switching regulated by uridylation

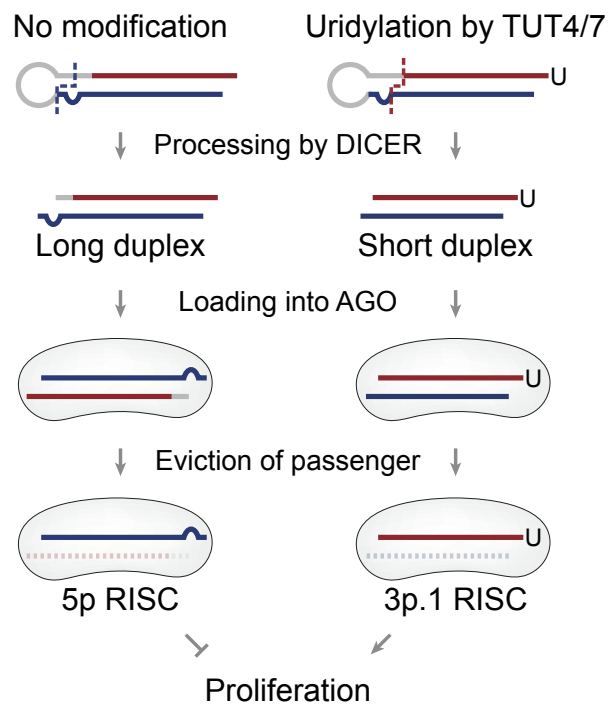

**Figure 7 | A proposed model of miR-324 arm switching mechanism and its functional consequences.**

## MicroRNA arm switching regulated by uridylation

---

al., 2013). This decay mechanism is generally utilized to constantly  
remove undesired RNAs from the cytoplasm.

However, the miRNA pathway uses the uridylation machinery to  
achieve intricate and cell type-specific regulations. The most extensively  
studied example is the *let-7* biogenesis. TUT4/7 oligo-uridylate pre-*let-7*  
specifically in the presence of LIN28 that is expressed highly in early  
embryos and certain types of cancer (Hagan et al., 2009; Heo et al.,  
2008; Heo et al., 2009; Thornton et al., 2012). Oligo-uridylation blocks  
DICER processing and induces decay of pre-*let-7*. In the absence of  
LIN28, group II pre-*let-7* with the suboptimal 1-nt 3' overhang structure  
is mono-uridylated by TUT4/7, which promotes DICER processing (Heo  
et al., 2012). Here, we reveal a new regulatory role for TUT4/7 in miRNA  
biogenesis. TUT4/7 mono- or di-uridylate pre-miR-324, which alters the  
DICER processing site and eventually leads to arm switching.  
Sequences and structure of pre-miR-324 are highly conserved in  
mammals (Figure S1D). Furthermore, the alternative isoforms are  
observed in all mammalian datasets (Figure 1D), supporting the  
biological relevance of TUT4/7-mediated alternative maturation of this  
miRNA.

*De novo* identification of isomiRs using sRNA-seq helped us to gain  
molecular insights of arm switching (Figure 1B). Comparative sRNA-seq  
analyses revealed many miRNAs with varying isomiR levels, which  
warrants future investigation. Figure S7 presents some interesting cases  
whose strand ratio and 5'-isomiR fraction fluctuate depending on cell  
types. For instance, miR-296, miR-671, and miR-676 show highly  
variable isomiR profiles. Thus, we anticipate that regulated arm  
switching is not limited to miR-324. Of note, we have not found evidence  
for uridylation on these miRNAs, suggesting different mechanism(s) may  
be at work. Alternative cleavage by DROSHA or DICER may partially  
explain the arm switching events because it can produce miRNA  
duplexes with different termini (Chiang et al., 2010; Kim et al., 2017; Kim  
et al., 2019; Ma et al., 2016; Tan et al., 2014; Wu et al., 2009). In

## MicroRNA arm switching regulated by uridylation

---

addition, a recent study reported that miRNA arm ratio can be influenced 393  
in part by differential decay rates which involves target-directed miRNA 394  
degradation (TDMD) (Zhang et al., 2019). It is unclear if and to what 395  
extent alternative processing and TDMD explain the variations we 396  
observe with sRNA-seq analyses across cell types/development (Figure 397  
S7). Future studies will be needed to elucidate the molecular 398  
mechanisms and physiological significance of regulation of these 399  
miRNAs. 400

In this study, we delineate the molecular mechanism of alternative 401  
DICER processing and revealed the role of the dsRBD. The DICER 402  
dsRBD has been known as an auxiliary domain that increases the 403  
overall RNA binding affinity of DICER and enhances processing 404  
efficiency (Ma et al., 2012; Zhang et al., 2004). However, our new 405  
results demonstrate that the dsRBD repositions pre-miR-324 in DICER, 406  
leading to a shift in the processing site. Thus, the dsRBD determines the 407  
processing sites together with the platform and PAZ domains that harbor 408  
the 5' and 3' pockets. This is interesting in light of our recent finding that 409  
the dsRBD of DROSHA also contributes to cleavage site selection by 410  
recognizing the “mGHG motif” on pri-miRNA (Fang and Bartel, 2015; 411  
Kwon et al., 2019). This role of the dsRBD may be deeply conserved 412  
across RNase III family members as the class I RNase III enzymes from 413  
*Aquifex aeolicus* and *Escherichia coli* also use the dsRBD for specific 414  
recognition of a sequence motif (Blaszczyk et al., 2004; Gan et al., 2006; 415  
Pertzev and Nicholson, 2006; Shi et al., 2011). It would be interesting to 416  
investigate to what extent the dsRBD is involved in the fidelity of DICER 417  
processing and which consensus sequence is recognized by the DICER 418  
dsRBD. Previously reported structures of human RNase III DROSHA 419  
and DICER do not contain the substrate RNAs in the 420  
processing-competent conformation (Kwon et al., 2016; Liu et al., 2018). 421  
Further structural and biochemical studies will be needed to understand 422  
the basis of this deeply conserved yet class-specific substrate 423  
recognition mechanism. 424



## MicroRNA arm switching regulated by uridylation

---

Lastly, we demonstrate that in GBM, the upregulated TUT4/7 control 425  
the miR-324 maturation in favor of 3p.1. Intriguingly, similar regulation 426  
may be in effect in hepatocellular carcinoma (HCC) where miR-324-5p is 427  
reduced and miR-324-3p.1 is upregulated (Cao et al., 2015; Tuo et al., 428  
2017; Xiao et al., 2017). Previous studies collectively suggest that 429  
miR-324-5p and miR-324-3p.1 have divergent roles in HCC progression. 430  
It remains to be investigated if miR-324 arm switching in HCC is also 431  
mediated by TUT4/7. It would be useful to examine what other types of 432  
diseases are associated with dysregulation of TUT4/7 and miRNA arm 433  
switching (Kuo et al., 2016). Developing chemical inhibitors against 434  
TUT4/7 and testing their effects on tumor would also be of interest. 435  
Moreover, because the ratios between miR-324 isoforms differ 436  
depending on cell conditions/types, the miR-324 arm ratio may serve as 437  
a sensitive reporter for TUT4/7 activity *in vivo* and a marker for cancer 438  
diagnosis. Our study provides insights into the biological roles and 439  
potential applications of miRNA regulation and modification. 440



## METHODS

441

**AQ-seq library preparation.** AQ-seq (bias-minimized sRNA-seq) libraries were constructed using total RNAs from fifteen mouse tissues (Mouse Total RNA Master Panel; Takara) as described in our previous study (Kim et al., 2019). Briefly, we mixed 5 µg of total RNAs with 10 fmole of thirty equimolar spike-in RNAs which are miRNA-like non-human/mouse/frog/fish RNAs used for bias evaluation. Small RNAs were enriched by size fractionation by 15% urea-polyacrylamide gel electrophoresis and sequentially ligated to the randomized adapter at the 3' and 5' ends. The ligated RNAs were reverse-transcribed using SuperScript III reverse transcriptase (Invitrogen), amplified using Phusion High-Fidelity DNA Polymerase (Thermo Scientific), and subjected to high-throughput sequencing on the MiSeq platform (Illumina).

**Analysis of high-throughput sequencing of miRNAs.** Data processing was performed as described in our previous study (Kim et al., 2019) except that reads of the sRNA-seq results from mouse were mapped to the mouse genome (mm10). Briefly, the 3' adapter was clipped from the reads using cutadapt (Martin, 2011). For AQ-seq data, 4-nt degenerate sequences were further removed with FASTX-Toolkit ([http://hannonlab.cshl.edu/fastx\\_toolkit/](http://hannonlab.cshl.edu/fastx_toolkit/)). After filtering out short, low-quality, and artifact reads using FASTX-Toolkit, AQ-seq data were aligned to the spike-in sequences first and the unaligned reads were mapped to the genome next, while the other sRNA-seq data were mapped to the genome using BWA (Li and Durbin, 2010). For a given read, we selected alignment result(s) with the best alignment score allowing mismatches only at the 3' end. miRNA annotations were retrieved using miRBase release 21 by the intersect tool in BEDTools (Kozomara and Griffiths-Jones, 2014; Quinlan and Hall, 2010). For quantitative analysis of miRNA strand ratios, we first identified the most abundant 5'-isomiR for a given mature miRNA in the most

## MicroRNA arm switching regulated by uridylation

---

abundantly expressed cell line or tissue. Then, the ratio between the top 472  
5'-isomiRs from 5p and 3p was calculated for all of the cell lines or 473  
tissues. Non-repetitive miRNA genes whose both strands are annotated 474  
in miRBase release 21 were included in this analysis. 475

**Targetome analysis.** Results from two modified versions of AGO 476  
CLIP-seq (CLEAR-CLIP and CLASH) were analyzed to identify miR-324 477  
targets (Helwak et al., 2013; Moore et al., 2015). For analysis of 478  
CLEAR-CLIP, the 3' and 5' adapters were clipped using cutadapt 479  
followed by extraction of reads containing miR-324 sequences. The 480  
target RNA sequences were then mapped to the mouse genome 481  
(mm10). Annotations were retrieved using GENCODE release M19 by 482  
the intersect tool in BEDTools. For analysis of CLASH, the 483  
supplementary file of the CLASH data generated by the protocol E4 was 484  
used. Target genes of miR-324-3p were subdivided according to the 5' 485  
end of the miR-324-3p sequences. 486

For prediction of miR-324 targets, we utilized TargetScan Human 487  
release 7.2 where target sites were identified based on the seed 488  
sequences of miR-324-5p (GCAUCC) or miR-324-3p.1 (CUGCCC) 489  
(Agarwal et al., 2015). Predicted targets with cumulative weighted 490  
context++ score below  $-0.2$  were included in this analysis. 491

**Plasmid construction.** To construct plasmids for expression of wild 492  
type, 5' pocket mutant, and 3' pocket mutant DICER, the coding 493  
sequence of the current human 494  
textitDICER reference (RefSeq NM\_030621) was amplified with or 495  
without mutations introduced in our previous study (Park et al., 2011). 496  
The amplified DNAs were subcloned into the pCK-FLAG vector (CMV 497  
promoter-driven vector) at the BamHI and XhoI sites using In-Fusion HD 498  
Cloning Kit (Clontech). For dsRBD-deleted DICER, the coding region 499  
except the sequence corresponding to V1849–S1922 amino acids was 500  
amplified and subcloned into the pCK-FLAG vector in the same way. For 501  
TRBP, the coding sequence of the current human 502  
textitTRBP reference (RefSeq NM\_134323) was amplified and 503

## MicroRNA arm switching regulated by uridylation

---

subcloned into the pcDNA3-cMyc vector (Invitrogen) at the BamHI and XhoI sites. To construct plasmids for luciferase assay, synthetic DNA oligos containing three 8mer target sites of either miR-1-3p, miR-324-5p, or miR-324-3p.1 were amplified and inserted into pmirGLO (Promega) at the XhoI and XbaI sites. The sequences of synthetic DNA oligos and PCR primers are listed in Supplementary Table S1.

**Cell culture and transfection.** A172 and U87MG were obtained from Korean Cell Line Bank. HEK293T, A172, and U87MG were maintained in DMEM (WELGENE) supplemented with 10% fetal bovine serum (WELGENE). Primary tumor cells derived from a glioblastoma patient (TS13-64) were established from fresh glioblastoma tissue specimens, as approved by the institutional review board of Yonsei University College of Medicine (4-2012-0212, 4-2014-0649). For tumorsphere culture, TS13-64 cells were grown in DMEM (WELGENE) supplemented with 1X B-27 (Thermo Scientific), 20 ng/mL of bFGF (R&D Systems), and 20 ng/mL of EGF (Sigma-Aldrich) (Kong et al., 2013).

To knock down TUT4/7, cells were transfected with 20–22 nM siRNAs using the Lipofectamine 3000 reagent (Thermo Scientific) twice and harvested 4 days after 1st transfection. For overexpression of DICER, HEK293T cells were transfected with pCK-FLAG-DICER using the Lipofectamine 3000 reagent (Thermo Scientific) and harvested 2 days post transfection. To deliver synthetic miRNAs or inhibitors, cells were transfected with 20 nM of synthetic miRNA duplexes or 40 nM of LNA miRNA inhibitors using Lipofectamine 3000 reagent (Thermo Scientific) and harvested 2 days after transfection. For simultaneous transfection of synthetic miRNAs and inhibitors, cells were transfected with 20 nM of synthetic miRNA duplexes and 80 nM of LNA miRNA inhibitors. For RNA-seq, we harvested cells 1 day after transfection to minimize the secondary effect.

Control siRNA (AccuTarget Negative Control siRNA), siRNAs, control miRNA, and synthetic miR-324 duplexes were obtained from Bioneer. Control miRNA inhibitor (miRCURY LNA miRNA Inhibitor Negative

## MicroRNA arm switching regulated by uridylation

---

control A) and miR-324 inhibitors (hsa-miR-324-5p and hsa-miR-324-3p  
miRCURY LNA miRNA Inhibitor) were obtained from QIAGEN. The  
sequences of synthetic siRNAs and miRNAs are listed in Supplementary  
Table S1.

**Northern blot.** Total RNAs were isolated using TRIzol (Invitrogen) and  
small RNAs (< 200 nt) were enriched with the mirVana miRNA Isolation  
Kit (Ambion). The RNAs were resolved on 15% urea-polyacrylamide  
gels. Synthetic miR-324 duplex and Decade Markers System (Ambion)  
were loaded as size markers. RNAs were transferred to Hybond-NX  
membranes (Amersham) and crosslinked to the membranes with  
1-ethyl-3-(3-dimethylaminopropyl) carbodiimide (Pall and Hamilton,  
2008). Antisense probes were radiolabeled at their 5' ends with [ $\gamma$ -<sup>32</sup>P]  
ATP by T4 polynucleotide (Takara) and purified using Performa Spin  
Columns (Edge BioSystems). The membranes were incubated with  
denatured UltraPure Salmon Sperm DNA Solution (Thermo Scientific) in  
PerfectHyb Plus Hybridization Buffer, hybridized with antisense probes,  
and washed with mild wash buffer (0.05% SDS and 2X SSC) followed by  
stringent wash buffer (0.1% SDS and 0.1X SSC). Radioactive signals  
were detected by Typhoon FLA 7000 (GE Healthcare) and analyzed  
using the Multi Gauge software (FujiFilm). miR-324-3p was detected  
first and miR-324-5p was detected next after stripping off the probes.  
Lastly, U6 snRNA was detected after stripping off the probes. To  
remove the probes from the blot, the membrane was soaked in  
pre-boiled 0.5% SDS for 15 min. Synthetic miR-324 duplex (AccuTarget)  
was obtained from Bioneer. The sequences of probes are listed in  
Supplementary Table S1.

**Quantitative real-time PCR (RT-qPCR).** To measure mRNA levels in  
mouse tissues, RNAs from Mouse Total RNA Master Panel (Takara)  
were reverse-transcribed using the RevertAid First Strand cDNA  
Synthesis Kit (Thermo Scientific) and subjected to quantitative real-time  
PCR with the Power SYBR Green PCR Master Mix (Thermo Scientific)  
on StepOnePlus Real-Time PCR System (Thermo Scientific). GAPDH

## MicroRNA arm switching regulated by uridylation

---

was used for internal control. The sequences of qPCR primers are listed 568  
in Supplementary Table S1. 569

To quantify the miR-324-5p/3p strand ratio, total RNAs were isolated 570  
using TRIzol (Invitrogen). cDNAs were then synthesized using the 571  
TaqMan miRNA Reverse Transcription kit (Applied Biosystems) and 572  
subjected to quantitative real-time PCR with the TaqMan gene 573  
expression assay kit (Applied Biosystems) on StepOnePlus Real-Time 574  
PCR System (Thermo Scientific). U6 snRNA was used for internal 575  
control. 576

***In vitro* DICER processing assay.** Pre-miR-324 and its variants were 577  
prepared by ligating two synthetic RNA fragments as previously 578  
described (Heo et al., 2009). They were radiolabeled at their 5' ends 579  
with [ $\gamma$ -<sup>32</sup>P] ATP by T4 polynucleotide (Takara) and purified using Oligo 580  
Clean & Concentrator (Zymo Research) according to manufacturer's 581  
instructions. 582

For immunoprecipitation of FLAG-DICER, the HEK293T cells 583  
overexpressing DICER proteins were lysed with lysis buffer (500 mM 584  
NaCl, 20 mM Tris (pH 8.0), 1 mM EDTA, 1% Triton X-100) and 585  
subjected to sonication using Bioruptor Standard (Diagenode). After 586  
centrifugation, the supernatant was incubated with 10  $\mu$ L of ANTI-FLAG 587  
M2 Affinity Gel (Sigma-Aldrich). The beads were washed twice with lysis 588  
buffer, four times with high salt buffer (800 mM NaCl and 50 mM Tris 589  
(pH 8.0)), and four times with buffer D (200 mM KCl, 20 mM Tris (pH 590  
8.0), 0.2 mM EDTA) and then resuspended in 10  $\mu$ L buffer D. 591

The immunopurified DICER was subjected to *in vitro* reactions in a total 592  
volume of 30  $\mu$ L containing 2 mM MgCl<sub>2</sub>, 1 mM DTT, 100 mM KCl, 10 593  
mM Tris (pH 8.0), 0.1 mM EDTA, 60 units of SUPERase In RNase 594  
Inhibitor (Thermo Scientific), and the 5'-radiolabeled pre-miR-324. The 595  
RNAs were purified with phenol extraction or Oligo Clean & 596  
Concentrator (Zymo Research) and resolved on 15% 597  
urea-polyacrylamide gels. Synthetic miR-324-5p and Decade Markers 598  
System (Ambion) were loaded as size markers. Synthetic pre-miR-324 599

## MicroRNA arm switching regulated by uridylation

---

fragments were obtained from IDT. Synthetic miR-324-5p was obtained 600  
from Bioneer. The sequences of synthetic pre-miR-324 fragments and 601  
miR-324-5p are listed in Supplementary Table S1. 602

**Dual luciferase reporter assay.** HEK293T cells were co-transfected 603  
with pmirGLO containing three 8mer target sites of either miR-1-3p, 604  
miR-324-5p, or miR-324-3p.1 along with control miRNA or miR-324 605  
duplexes using the Lipofectamine 3000 reagent (Thermo Scientific). 606  
After 2 days of transfection, cells were harvested and subjected to 607  
reporter assay. The reporter activities were measured using 608  
Dual-Luciferase Reporter Assay System according to the manufacturer's 609  
instructions (Promega) on the Spark microplate reader (TECAN). Given 610  
that miR-1-3p is little expressed in HEK293T (~8 RPM in the AQ-seq 611  
result) (Kim et al., 2019), pmirGLO with three 8mer target sites of 612  
miR-1-3p was used for a plasmid control. Control miRNA was used for 613  
further normalization. 614

**RNA-seq.** A172 cells were transfected with control miRNA or miR-324 615  
duplexes using the Lipofectamine 3000 reagent (Thermo Scientific). 616  
Cells were harvested after 1 day of transfection and total RNAs were 617  
isolated using TRIzol (Invitrogen). The RNA quality was confirmed using 618  
Agilent 2100 Bioanalyzer and DNA nanoball sequencing for 619  
transcriptome (oligo dT enrichment; stranded; 100 bp paired-end) was 620  
performed on the BGISEQ-500 platform by BGI Tech Solutions (Hong 621  
Kong). 622

For gene expression analysis, references were first built with the primary 623  
assembly from the human genome and “BestRefSeq” and “Curated 624  
Genomic” sources from the annotation of the RefSeq assembly 625  
accession GCF\_000001405.34 using RSEM with “-bowtie2” options (Li 626  
and Dewey, 2011). Then, RNA-seq data were analyzed to estimate 627  
gene expression levels using RSEM with “-paired-end” and “-bowtie2” 628  
options. 629

**Gene expression analysis of glioblastoma patients data.** From 630  
Oncopression (<http://oncopression.com>), preprocessed gene expression 631



## MicroRNA arm switching regulated by uridylation

---

data using microarray were retrieved (Lee and Choi, 2017). The REMBRANDT gene expression dataset (E-MTAB-3073) was obtained from ArrayExpress (Madhavan et al., 2009). For analysis of simultaneous profiling of mRNAs and miRNAs (Gulluoglu et al., 2018), raw microarray data were normalized by the robust multi-array average (RMA) using the limma package in R and then used for gene expression analysis.

**Survival analysis.** The level 3 miRNA gene quantification data and clinical data for TCGA glioblastoma patients were obtained from the GDC legacy archive and the GDC data portal, respectively. The patients were stratified according to the miR-324-5p/3p ratio and the top and bottom 40% of the cases were included in the analysis. The patient's survival was estimated by the Kaplan-Meier method and tested by the two-sided log-rank test using the survival package in R.

**Western blot.** Cells were harvested, washed with PBS and lysed in RIPA buffer (Thermo Scientific) complemented with protease inhibitor cocktail set III (Merck Millipore) and phosphatase inhibitor cocktail II (AG Scientific). Protein concentration was measured with the BCA Protein Assay Kit (Pierce Biotechnology) and equal amounts of protein were separated on 4–12% Tris-Glycine Gels (Thermo Scientific) and transferred onto Immobilon-P PVDF membranes (Merck Millipore). Membranes were incubated with 5% skimmed milk in PBS-T (PBS (Amresco) + 0.1% Tween 20 (Anatrace)) and then probed with primary antibodies. After being washed three times with PBS-T, the membranes were incubated with HRP-conjugated secondary antibodies. The protein bands were detected by SuperSignal West Pico PLUS Chemiluminescent Substrate (Thermo Scientific) and scanned by ChemiDoc XRS+ System (Bio-Rad).

**Antibodies.** The rabbit polyclonal antibodies against TUT4 (18980-1-AP, RRID:AB\_10598327, 1:500) and TUT7 (25196-1-AP, 1:500) were purchased from Proteintech. The mouse monoclonal antibody against Cyclin E (sc-247, RRID:AB\_627357, 1:1,000) and rabbit polyclonal

## MicroRNA arm switching regulated by uridylation

---

antibodies against Cyclin A (sc-751, RRID:AB\_631329, 1:1,000), Cyclin 664  
B1 (sc-752, RRID:AB\_2072134, 1:1,000), and Cyclin D1 (sc-753, 665  
RRID:AB\_2070433, 1:1,000) were purchased from Santa Cruz 666  
Biotechnology. The rabbit polyclonal antibody against HSP90 (4874, 667  
RRID:AB\_2121214, 1:1,000) was purchased from Cell Signaling. The 668  
HRP-conjugated goat polyclonal antibodies against rabbit IgG 669  
(111-035-144, RRID:AB\_2307391, 1:10,000) and mouse IgG 670  
(115-035-146, RRID:AB\_2307392, 1:10,000) were purchased from 671  
Jackson ImmunoResearch. 672

**Flow cytometry.** Cells were incubated with 10  $\mu$ M BrdU for 3–8 hr 673  
before fixation by ice-cold 70% ethanol. The fixed cells were incubated 674  
with FITC-conjugated anti-BrdU antibody (11-5071-42, 675  
RRID:AB\_11042627, Invitrogen), further stained with 20  $\mu$ g/mL of 676  
propidium iodide (Sigma-Aldrich) in the presence of 10  $\mu$ g/mL of RNase 677  
A (Thermo Scientific), and detected using BD Accuri C6 Plus Flow 678  
Cytometer. Cell cycle was analyzed by the BD Accuri C6 system 679  
software. 680

## SUPPLEMENTAL INFORMATION 681

### Supplementary Table 1 682

Lists of oligonucleotide sequences used in this study. 683

## ACKNOWLEDGMENTS 684

We are grateful to Eunji Kim for cloning and mutagenesis of expression 685  
constructs. We also thank Yoonseok Jung, Dongwan Kim, Hyunjoon 686  
Kim, Kijun Kim, Myeonghwan Kim, Sung-Chul Kwon, Yongwoo Na, Jae 687  
Ho Paek, Soomin Son, Buyeon Um, Hyerim Yi, and other members of 688  
our laboratory for their helpful discussions. The survival analysis result 689  
is based upon data generated by the TCGA Research Network: 690  
<https://www.cancer.gov/tcga>. This research was supported by the 691  
Institute for Basic Science from the Ministry of Science and ICT of Korea 692



## MicroRNA arm switching regulated by uridylation

---

(IBS-R008-D1 to H.K., J.K., S.Y., Y.Y.L., and V.N.K.), the BK21 693  
Research Fellowships from the Ministry of Education of Korea (to H.K. 694  
and Y.Y.L.), and the NRF (National Research Foundation of Korea) 695  
Grant funded by the Korean government (NRF-2015-Global Ph.D. 696  
Fellowship Program to H.K. and NRF-2018-Global Ph.D. Fellowship 697  
Program to Y.-Y.L.). 698

### **AUTHOR CONTRIBUTIONS**

Conceptualization, H.K., J.K., and V.N.K.; Methodology, H.K., J.K., S.Y., 700  
Y.-Y.L., and V.N.K.; Formal Analysis, H.K., J.P., R.J.C., and S.J.Y.; 701  
Investigation, H.K., J.K., S.Y., Y.-Y.L., J.P., R.J.C., and S.J.Y.; 702  
Resources, J.P., R.J.C., S.J.Y., and S.-G.K.; Writing – Original Draft, 703  
H.K., J.K., S.Y., J.P., R.J.C., S.J.Y., S.-G.K., and V.N.K.; Writing – 704  
Review & Editing, H.K., J.K., S.Y., Y.-Y.L., and V.N.K.; Visualization, 705  
H.K., J.K., and V.N.K.; Supervision, S.-G.K. and V.N.K.; Funding 706  
Acquisition, H.K., Y.-Y.L., and V.N.K.; 707

### **DECLARATION OF INTERESTS**

The authors declare no competing interests. 709

## MicroRNA arm switching regulated by uridylation

---

### References

1. Agarwal, V., Bell, G.W., Nam, J.W., and Bartel, D.P. (2015). Predicting effective microRNA target sites in mammalian mRNAs. *Elif*, 4.
2. Alivernini, S., Gremese, E., McSharry, C., Tolusso, B., Ferraccioli, G., McInnes, I.B., and Kurowska-Stolarska, M. (2017). MicroRNA-155-at the Critical Interface of Innate and Adaptive Immunity in Arthritis. *Front Immunol* 8, 1932.
3. Bartel, D.P. (2018). Metazoan MicroRNAs. *Cell* 173, 20–51.
4. Blaszczyk, J., Gan, J., Tropea, J.E., Court, D.L., Waugh, D.S., and Ji, X. (2004). Noncatalytic assembly of ribonuclease III with double-stranded RNA. *Structure* 12, 457–466.
5. Cao, L., Xie, B., Yang, X., Liang, H., Jiang, X., Zhang, D., Xue, P., Chen, D., and Shao, Z. (2015). MiR-324-5p Suppresses Hepatocellular Carcinoma Cell Invasion by Counteracting ECM Degradation through Post-Transcriptionally Downregulating ETS1 and SP1. *PLoS One* 10, e0133074.
6. Chang, H.M., Triboulet, R., Thornton, J.E., and Gregory, R.I. (2013). A role for the Perlman syndrome exonuclease Dis3l2 in the Lin28-let-7 pathway. *Nature* 497, 244–248.
7. Chen, L., Sun, H., Wang, C., Yang, Y., Zhang, M., and Wong, G. (2018). miRNA arm switching identifies novel tumour biomarkers. *EBioMedicine* 38, 37–46.
8. Chiang, H.R., Schoenfeld, L.W., Ruby, J.G., Auyeung, V.C., Spies, N., Baek, D., Johnston, W.K., Russ, C., Luo, S., Babiarz, J.E., et al. (2010). Mammalian microRNAs: experimental evaluation of novel and previously annotated genes. *Genes Dev* 24, 992–1009.
9. de Wit, E., Linsen, S.E., Cuppen, E., and Berezikov, E. (2009). Repertoire and evolution of miRNA genes in four divergent nematode species. *Genome Res* 19, 2064–2074.
10. Denli, A.M., Tops, B.B., Plasterk, R.H., Ketting, R.F., and Hannon, G.J. (2004). Processing of primary microRNAs by the Microprocessor complex. *Nature* 432, 231–235.
11. Elkayam, E., Kuhn, C.D., Tocilj, A., Haase, A.D., Greene, E.M., Hannon, G.J., and Joshua-Tor, L. (2012). The structure of human argonaute-2 in complex with miR-20a. *Cell* 150, 100–110.
12. Fang, W., and Bartel, D.P. (2015). The Menu of Features that Define Primary MicroRNAs and Enable De Novo Design of MicroRNA Genes. *Mol Cell* 60, 131–145.
13. Ferretti, E., De Smaele, E., Miele, E., Laneve, P., Po, A., Pelloni, M., Paganelli, A., Di Marcotullio, L., Caffarelli, E., Screpanti, I., et al. (2008). Concerted microRNA control of Hedgehog signalling in cerebellar neuronal progenitor and tumour cells. *EMBO J* 27, 2616–2627.
14. Frank, F., Sonenberg, N., and Nagar, B. (2010). Structural basis for 5'-nucleotide base-specific recognition of guide RNA by human AGO2. *Nature* 465, 818–822.

## MicroRNA arm switching regulated by uridylation

---

15. Fromm, B., Domanska, D., Hoye, E., Ovchinnikov, V., Kang, W., Aparicio-Puerta, E., Johansen, M., Flatmark, K., Mathelier, A., Hovig, E., et al. (2019). MirGeneDB 2.0: the metazoan microRNA complement. *Nucleic Acid, Res.*
16. Fukunaga, R., Han, B.W., Hung, J.H., Xu, J., Weng, Z., and Zamore, P.D. (2012). *Dicer* partner proteins tune the length of mature miRNAs in flies and mammals. *Cell* *151*, 533–546.
17. Gan, J., Tropea, J.E., Austin, B.P., Court, D.L., Waugh, D.S., and Ji, X. (2006). Structural insight into the mechanism of double-stranded RNA processing by ribonuclease III. *Cell* *124*, 355–366.
18. Ghildiyal, M., Xu, J., Seitz, H., Weng, Z., and Zamore, P.D. (2010). Sorting of *Drosophila* small silencing RNAs partitions microRNA\* strands into the RNA interference pathway. *RNA* *16*, 43–56.
19. Gregory, R.I., Yan, K.P., Amuthan, G., Chendrimada, T., Doratotaj, B., Cooch, N., and Shiekhattar, R. (2004). The Microprocessor complex mediates the genesis of microRNAs. *Nature* *432*, 235–240.
20. Griffiths-Jones, S., Hui, J.H., Marco, A., and Ronshaugen, M. (2011). MicroRNA evolution by arm switching. *EMBO Rep* *12*, 172–177.
21. Gulluoglu, S., Tuysuz, E.C., Sahin, M., Kuskucu, A., Kaan Yaltirik, C., Ture, U., Kucukkaraduman, B., Akbar, M.W., Gure, A.O., Bayrak, O.F., et al. (2018). Simultaneous miRNA and mRNA transcriptome profiling of glioblastoma samples reveals a novel set of OncomiR candidates and their target genes. *Brain Res* *1700*, 199–210.
22. Hagan, J.P., Piskounova, E., and Gregory, R.I. (2009). Lin28 recruits the TUTase Zochc11 to inhibit *let-7* maturation in mouse embryonic stem cells. *Nat Struct Mol Biol* *16*, 1021–1025.
23. Han, J., Lee, Y., Yeom, K.H., Kim, Y.K., Jin, H., and Kim, V.N. (2004). The Drosha-DGCR8 complex in primary microRNA processing. *Genes Dev* *18*, 3016–3027.
24. Helwak, A., Kudla, G., Dudnakova, T., and Tollervey, D. (2013). Mapping the human miRNA interactome by CLASH reveals frequent noncanonical binding. *Cell* *153*, 654–665.
25. Heo, I., Ha, M., Lim, J., Yoon, M.J., Park, J.E., Kwon, S.C., Chang, H., and Kim, V.N. (2012). Mono-uridylation of pre-microRNA as a key step in the biogenesis of group II *let-7* microRNAs. *Cell* *151*, 521–532.
26. Heo, I., Joo, C., Cho, J., Ha, M., Han, J., and Kim, V.N. (2008). Lin28 mediates the terminal uridylation of *let-7* precursor MicroRNA. *Mol Cell* *32*, 276–284.
27. Heo, I., Joo, C., Kim, Y.K., Ha, M., Yoon, M.J., Cho, J., Yeom, K.H., Han, J., and Kim, V.N. (2009). TUT4 in concert with Lin28 suppresses microRNA biogenesis through pre-microRNA uridylation. *Cell* *138*, 696–708.

## MicroRNA arm switching regulated by uridylation

---

28. Iwasaki, S., Kobayashi, M., Yoda, M., Sakaguchi, Y., Katsuma, S., Suzuki, T., and Tomari, Y. (2010). Hsc70/Hsp90 chaperone machinery mediates ATP-dependent RISC loading of small RNA duplexes. *Mol Cell* *39*, 292–299.
29. Khvorova, A., Reynolds, A., and Jayasena, S.D. (2003). Functional siRNAs and miRNAs exhibit strand bias. *Cell* *115*, 209–216.
30. Kim, B., Ha, M., Loeff, L., Chang, H., Simanshu, D.K., Li, S., Fareh, M., Patel, D.J., Joo, C., and Kim, V.N. (2015). TUT7 controls the fate of precursor microRNAs by using three different uridylation mechanisms. *EMBO J* *34*, 1801–1815.
31. Kim, B., Jeong, K., and Kim, V.N. (2017). Genome-wide Mapping of DROSHA Cleavage Sites on Primary MicroRNAs and Noncanonical Substrates. *Mol Cell* *66*, 258–266, e255.
32. Kim, H., Kim, J., Kim, K., Chang, H., You, K., and Kim, V.N. (2019). Bias-minimized quantification of microRNA reveals widespread alternative processing and 3' end modification. *Nucleic Acids Res* *47*, 2630–2640.
33. Kong, B.H., Park, N.R., Shim, J.K., Kim, B.K., Shin, H.J., Lee, J.H., Huh, Y.M., Lee, S.J., Kim, S.H., Kim, E.H., et al. (2013). Isolation of glioma cancer stem cells in relation to histological grades in glioma specimens. *Childs Nerv Syst* *29*, 217–229.
34. Kozomara, A., Birgaoanu, M., and Griffiths-Jones, S. (2019). miRBase: from microRNA sequences to function. *Nucleic Acids Res* *47*, D155–D162.
35. Kozomara, A., and Griffiths-Jones, S. (2014). miRBase: annotating high confidence microRNAs using deep sequencing data. *Nucleic Acids Res* *42*, D68–73.
36. Kuo, W.T., Yu, S.Y., Li, S.C., Lam, H.C., Chang, H.T., Chen, W.S., Yeh, C.Y., Hung, S.F., Liu, T.C., Wu, T., et al. (2016). MicroRNA-324 in Human Cancer: miR-324-5p and miR-324-3p Have Distinct Biological Functions in Human Cancer. *Anticancer Res* *36*, 5189–5196.
37. Kwon, S.C., Baek, S.C., Choi, Y.G., Yang, J., Lee, Y.S., Woo, J.S., and Kim, V.N. (2019). Molecular Basis for the Single-Nucleotide Precision of Primary microRNA Processing. *Mol Cell* *73*, 505–511, e505.
38. Kwon, S.C., Nguyen, T.A., Choi, Y.G., Jo, M.H., Hohng, S., Kim, V.N., and Woo, J.S. (2016). Structure of Human DROSHA. *Cell* *164*, 81–90.
39. Labno, A., Warkocki, Z., Kulinski, T., Krawczyk, P.S., Bijata, K., Tomecki, R., and Dziembowski, A. (2016). Perlman syndrome nuclease DIS3L2 controls cytoplasmic non-coding RNAs and provides surveillance pathway for maturing snRNAs. *Nucleic Acids Res* *44*, 10437–10453.
40. Lackey, P.E., Welch, J.D., and Marzluff, W.F. (2016). TUT7 catalyzes the uridylation of the 3' end for rapid degradation of histone mRNA. *RNA* *22*, 1673–1688.
41. Lau, N.C., Lim, L.P., Weinstein, E.G., and Bartel, D.P. (2001). An abundant class of tiny RNAs with probable regulatory roles in *Caenorhabditis elegans*. *Science* *294*, 858–862.

## MicroRNA arm switching regulated by uridylation

---

42. Le Pen, J., Jiang, H., Di Domenico, T., Kneuss, E., Kosalka, J., Leung, C., Morgan, M., Much, C., Rudolph, K.L.M., Enright, A.J., et al. (2018). Terminal uridylyltransferases target RNA viruses as part of the innate immune system. *Nat Struct Mol Biol* *25*, 778–786.
43. Lee, H.Y., and Doudna, J.A. (2012). TRBP alters human precursor microRNA processing in vitro. *RNA* *18*, 2012–2019.
44. Lee, J., and Choi, C. (2017). Oncopression: gene expression compendium for cancer with matched normal tissues. *Bioinformatics* *33*, 2068–2070.
45. Lee, Y., Ahn, C., Han, J., Choi, H., Kim, J., Yim, J., Lee, J., Provost, P., Radmark, O., Kim, S., et al. (2003). The nuclear RNase III Drosha initiates microRNA processing. *Nature* *425*, 415–419.
46. Li, B., and Dewey, C.N. (2011). RSEM: accurate transcript quantification from RNA-Seq data with or without a reference genome. *BMC Bioinformatics* *12*, 323.
47. Li, H., and Durbin, R. (2010). Fast and accurate long-read alignment with Burrows-Wheeler transform. *Bioinformatics* *26*, 589–595.
48. Lim, J., Ha, M., Chang, H., Kwon, S.C., Simanshu, D.K., Patel, D.J., and Kim, V.N. (2014). Uridylation by TUT4 and TUT7 marks mRNA for degradation. *Cell* *159*, 1365–1376.
49. Liu, X., Zheng, Q., Vrettos, N., Maragkakis, M., Alexiou, P., Gregory, B.D., and Mourelatos, Z. (2014). A MicroRNA precursor surveillance system in quality control of MicroRNA synthesis. *Mol Cell* *55*, 868–879.
50. Liu, Z., Wang, J., Cheng, H., Ke, X., Sun, L., Zhang, Q.C., and Wang, H.W. (2018). Cryo-EM Structure of Human *Dicer* and Its Complexes with a Pre-miRNA Substrate. *Cell* *173*, 1191–120, e1112.
51. Ma, E., Zhou, K., Kidwell, M.A., and Doudna, J.A. (2012). Coordinated activities of human dicer domains in regulatory RNA processing. *J Mol Biol* *422*, 466–476.
52. Ma, H., Wu, Y., Niu, Q., Zhang, J., Jia, G., Manjunath, N., and Wu, H. (2016). A sliding-bulge structure at the *Dicer* processing site of pre-miRNAs regulates alternative *Dicer* processing to generate 5'-isomiRs. *Heliyon* *2*, e00148.
53. Ma, J.B., Yuan, Y.R., Meister, G., Pei, Y., Tuschl, T., and Patel, D.J. (2005). Structural basis for 5'-end-specific recognition of guide RNA by the *A. fulgidus* Piwi protein. *Nature* *434*, 666–670.
54. MacRae, I.J., Zhou, K., and Doudna, J.A. (2007). Structural determinants of RNA recognition and cleavage by *Dicer*. *Nat Struct Mol Biol* *14*, 934–940.
55. Macrae, I.J., Zhou, K., Li, F., Repic, A., Brooks, A.N., Cande, W.Z., Adams, P.D., and Doudna, J.A. (2006). Structural basis for double-stranded RNA processing by *Dicer*. *Science* *311*, 195–198.
56. Madhavan, S., Zenklusen, J.C., Kotliarov, Y., Sahni, H., Fine, H.A., and Buetow, K. (2009). Rembrandt: helping personalized medicine become a reality through integrative translational research. *Mol Cancer Res* *7*, 157–167.

## MicroRNA arm switching regulated by uridylation

---

57. Martin, M. (2011). Cutadapt removes adapter sequences from high-throughput sequencing reads. *EMBnet.journal* *17*, 10–12.
58. Mayr, C., and Bartel, D.P. (2009). Widespread shortening of 3'UTRs by alternative cleavage and polyadenylation activates oncogenes in cancer cells. *Cell* *138*, 673–684.
59. Moore, M.J., Scheel, T.K., Luna, J.M., Park, C.Y., Fak, J.J., Nishiuchi, E., Rice, C.M., and Darnell, R.B. (2015). miRNA-target chimeras reveal miRNA 3'-end pairing as a major determinant of Argonaute target specificity. *Nat Commun* *6*, 8864.
60. Morgan, M., Much, C., DiGiacomo, M., Azzi, C., Ivanova, I., Vitsios, D.M., Pistollic, J., Collier, P., Moreira, P.N., Benes, V., et al. (2017). mRNA 3' uridylation and poly(A) tail length sculpt the mammalian maternal transcriptome. *Nature* *548*, 347–351.
61. Naruse, K., Matsuura-Suzuki, E., Watanabe, M., Iwasaki, S., and Tomari, Y. (2018). In vitro reconstitution of chaperone-mediated human RISC assembly. *RNA* *24*, 6–11.
62. Pall, G.S., and Hamilton, A.J. (2008). Improved northern blot method for enhanced detection of small RNA. *Nat Protoc* *3*, 1077–1084.
63. Park, J.E., Heo, I., Tian, Y., Simanshu, D.K., Chang, H., Jee, D., Patel, D.J., and Kim, V.N. (2011). *Dicer* recognizes the 5' end of RNA for efficient and accurate processing. *Nature* *475*, 201–205.
64. Parker, J.S., Roe, S.M., and Barford, D. (2005). Structural insights into mRNA recognition from a PIWI domain-siRNA guide complex. *Nature* *434*, 663–666.
65. Pertzev, A.V., and Nicholson, A.W. (2006). Characterization of RNA sequence determinants and antideterminants of processing reactivity for a minimal substrate of *Escherichia coli* ribonuclease III. *Nucleic Acids Res* *34*, 3708–3721.
66. Pirouz, M., Munafo, M., Ebrahimi, A.G., Choe, J., and Gregory, R.I. (2019). Exonuclease requirements for mammalian ribosomal RNA biogenesis and surveillance. *Nat Struct Mol Biol* *26*, 490–500.
67. Quinlan, A.R., and Hall, I.M. (2010). BEDTools: a flexible suite of utilities for comparing genomic features. *Bioinformatics* *26*, 841–842.
68. Ro, S., Park, C., Young, D., Sanders, K.M., and Yan, W. (2007). Tissue-dependent paired expression of miRNAs. *Nucleic Acids Res* *35*, 5944–5953.
69. Robinson, M.D., McCarthy, D.J., and Smyth, G.K. (2010). edgeR: a Bioconductor package for differential expression analysis of digital gene expression data. *Bioinformatics* *26*, 139–140.
70. Schirle, N.T., and MacRae, I.J. (2012). Structure and Mechanism of Argonaute Proteins. *32*, 83–100.
71. Schwarz, D.S., Hutvagner, G., Du, T., Xu, Z., Aronin, N., and Zamore, P.D. (2003). Asymmetry in the assembly of the RNAi enzyme complex. *Cell* *115*, 199–208.



## MicroRNA arm switching regulated by uridylation

---

72. Shi, Z., Nicholson, R.H., Jaggi, R., and Nicholson, A.W. (2011). Characterization of *Aquifex aeolicus* ribonuclease III and the reactivity epitopes of its pre-ribosomal RNA substrates. *Nucleic Acids Res* *39*, 2756–2768.
73. Skalsky, R.L., and Cullen, B.R. (2011). Reduced expression of brain-enriched microRNAs in glioblastomas permits targeted regulation of a cell death gene. *PLoS One* *6*, e24248.
74. Suzuki, H.I., Katsura, A., Yasuda, T., Ueno, T., Mano, H., Sugimoto, K., and Miyazono, K. (2015). Small-RNA asymmetry is directly driven by mammalian Argonautes. *Nat Struct Mol Biol* *22*, 512–521.
75. Tan, G.C., Chan, E., Molnar, A., Sarkar, R., Alexieva, D., Isa, I.M., Robinson, S., Zhang, S., Ellis, P., Langford, C.F., et al. (2014). 5' isomiR variation is of functional and evolutionary importance. *Nucleic Acids Res* *42*, 9424–9435.
76. Thornton, J.E., Chang, H.M., Piskounova, E., and Gregory, R.I. (2012). Lin28-mediated control of *let-7* microRNA expression by alternative TUTases Zcchc11 (TUT4) and Zcchc6 (TUT7). *RNA* *18*, 1875–1885.
77. Tian, Y., Simanshu, D.K., Ma, J.B., Park, J.E., Heo, I., Kim, V.N., and Patel, D.J. (2014). A phosphate-binding pocket within the platform-PAZ-connector helix cassette of human *Dicer*. *Mol Cell* *53*, 606–616.
78. Tsai, K.W., Leung, C.M., Lo, Y.H., Chen, T.W., Chan, W.C., Yu, S.Y., Tu, Y.T., Lam, H.C., Li, S.C., Ger, L.P., et al. (2016). Arm Selection Preference of MicroRNA-193a Varies in Breast Cancer. *Sci Rep* *6*, 28176.
79. Tuo, H., Wang, Y., Wang, L., Yao, B., Li, Q., Wang, C., Liu, Z., Han, S., Yin, G., Tu, K., et al. (2017). MiR-324-3p promotes tumor growth through targeting DACT1 and activation of Wnt/beta-catenin pathway in hepatocellular carcinoma. *Oncotarget* *8*, 65687–65698.
80. Warkocki, Z., Krawczyk, P.S., Adamska, D., Bijata, K., Garcia-Perez, J.L., and Dziembowski, A. (2018). Uridylation by TUT4/7 Restricts Retrotransposition of Human LINE-1s. *Cell* *174*, 1537–1544, e1529.
81. Wilson, R.C., Tambe, A., Kidwell, M.A., Noland, C.L., Schneider, C.P., and Doudna, J.A. (2015). *Dicer*-TRBP complex formation ensures accurate mammalian microRNA biogenesis. *Mol Cell* *57*, 397–407.
82. Wu, H., Ye, C., Ramirez, D., and Manjunath, N. (2009). Alternative processing of primary microRNA transcripts by Drosha generates 5' end variation of mature microRNA. *PLoS One* *4*, e7566.
83. Xiao, W.L., Zeng, H.L., Wang, Y.Z., Gou, Q., Zhou, Z.J., Xu, R.D., Li, W.K., Zhuang, W.X., and Chen, X.M. (2017). Up-regulation of miR-324 suppresses cell apoptosis by targeting DUSP1 in hepatocellular carcinoma. *International Journal of Clinical and Experimental Pathology* *10*, 1243–1252.

## MicroRNA arm switching regulated by uridylation

---

84. Zhang, H., Kolb, F.A., Brondani, V., Billy, E., and Filipowicz, W. (2002). Human *Dicer* preferentially cleaves dsRNAs at their termini without a requirement for ATP. *EMBO J* *21*, 5875–5885.
85. Zhang, H., Kolb, F.A., Jaskiewicz, L., Westhof, E., and Filipowicz, W. (2004). Single processing center models for human *Dicer* and bacterial RNase III. *Cell* *118*, 57–68.
86. Zhang, Z., Pi, J., Zou, D., Wang, X., Xu, J., Yu, S., Zhang, T., Li, F., Zhang, X., Zhao, H., et al. (2019). microRNA arm-imbalance in part from complementary targets mediated decay promotes gastric cancer progression. *Nat Commun* *10*, 4397.
87. Zhi, T., Yu, T., Pan, M., Nie, E., Wu, W., Wang, X., Liu, N., You, Y., Wang, Y., and Zhang, J. (2017). EZH2 alteration driven by microRNA-524-5p and microRNA-324-5p promotes cell proliferation and temozolomide resistance in glioma. *Oncotarget* *8*, 96239–96248.
88. Zhou, H., Huang, X., Cui, H., Luo, X., Tang, Y., Chen, S., Wu, L., and Shen, N. (2010). miR-155 and its star-form partner miR-155\* cooperatively regulate type I interferon production by human plasmacytoid dendritic cells. *Blood* *116*, 5885–5894.



## MicroRNA arm switching regulated by uridylation

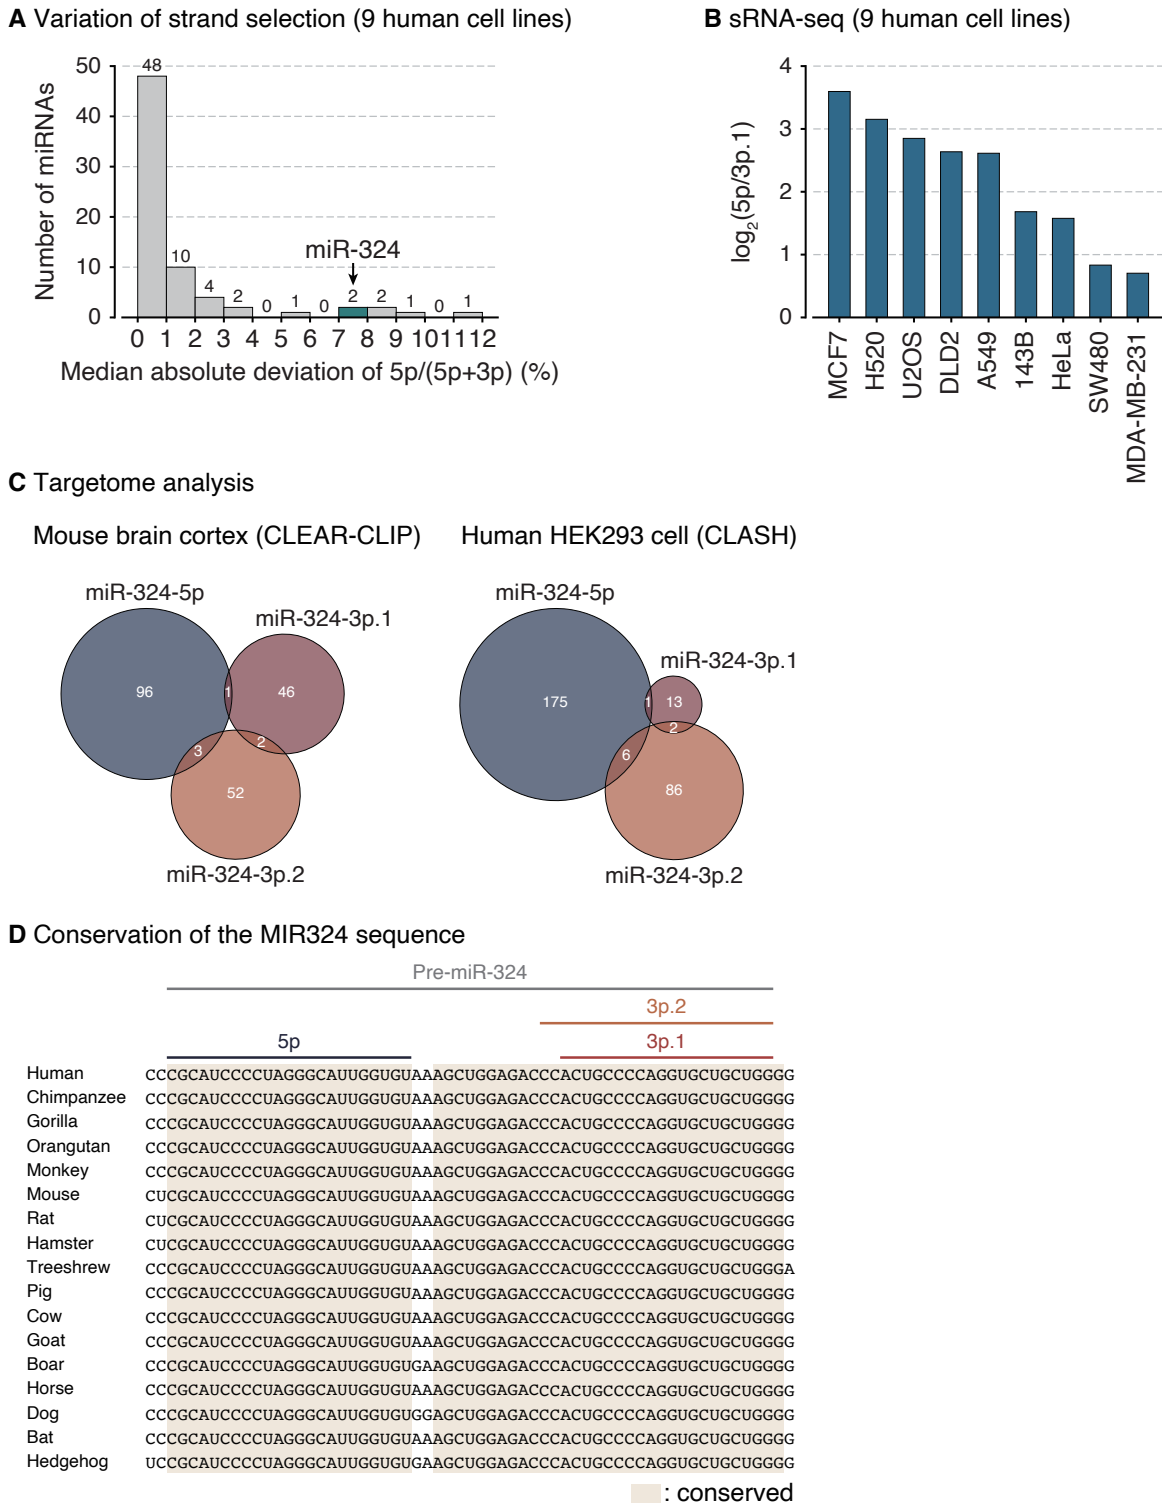

**Figure S1, related to Figure 1 | miR-324 undergoes alternative strand selection and has conserved and functionally distinct 5'-isomiRs.**  
(continued on the next page)

## MicroRNA arm switching regulated by uridylation

---

**Figure S1** (*previous page*) | **(A)** Median absolute deviation of the 5p proportion for a given miRNA in human cell lines. Abundant and ubiquitous miRNAs (> 100 median RPM in both human cell line and mouse tissue datasets, > 0 RPM in all samples) were included in this analysis. **(B)** Strand ratios (5p/3p.1) of miR-324 across the indicated panel of human cell lines as measured by sRNA-seq. **(C)** Targetome analysis of three 5'-isomiRs of miR-324. Target RNAs were identified from chimeric reads composed of each 5'-isomiR and bound target RNAs. **(D)** Sequence conservation of the MIR324 gene in mammals.

## MicroRNA arm switching regulated by uridylation

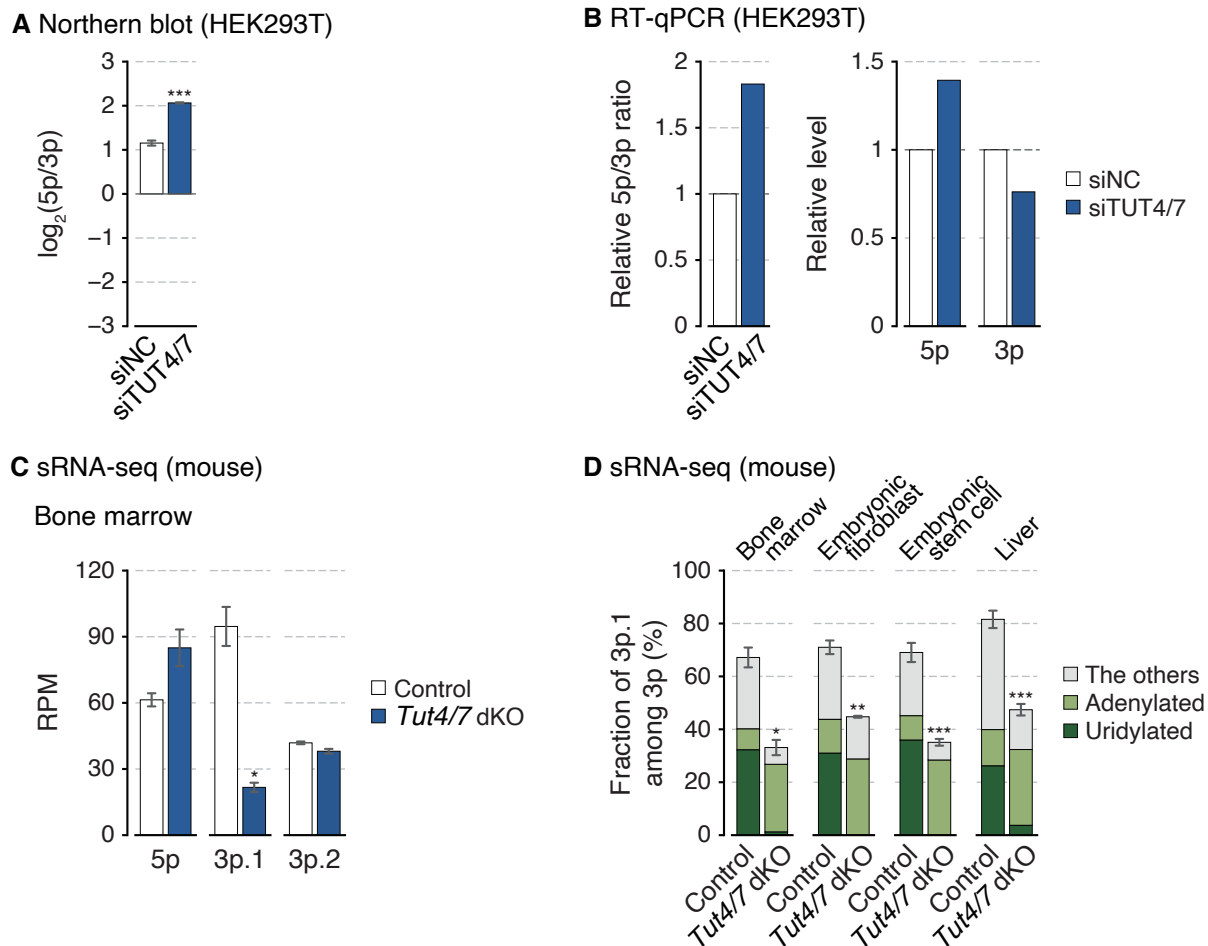

### Figure S2, related to Figure 2 | TUT4/7 regulate miR-324 arm switching.

**(A)** The miR-324-5p/3p ratio calculated from band intensities of the northern blot (Figure 2D). Synthetic miR-324 duplex was used for normalization. Bars indicate mean  $\pm$  s.d. ( $n = 3$ , biological replicates). \*\*\* $p < 0.001$  by the two-sided paired  $t$  test. **(B)** The relative miR-324-5p/3p ratio and their expression levels measured by RT-qPCR after knockdown of T<sub>UT</sub>4/7 in HEK293T. **(C)** Relative abundance of three 5'-isomiRs of miR-324 in mouse bone marrow. Bars indicate mean  $\pm$  s.d. ( $n = 2$ , biological replicates). \* $p < 0.05$  by the two-sided Student's  $t$  test. RPM, reads per million. **(D)** Fraction of miR-324-3p.1 among 3p strand in mice. The type of the 3' end modification is indicated with different colors. Bars indicate mean  $\pm$  s.d. (bone marrow,  $n = 2$ ; embryonic fibroblast,  $n = 2$ ; embryonic stem cell,  $n = 3$ ; control and *Tut4/7* dKO in liver,  $n = 4$  and 3, respectively). \* $p < 0.05$ , \*\* $p < 0.01$ , \*\*\* $p < 0.001$  by the two-sided Student's  $t$  test.

## MicroRNA arm switching regulated by uridylation

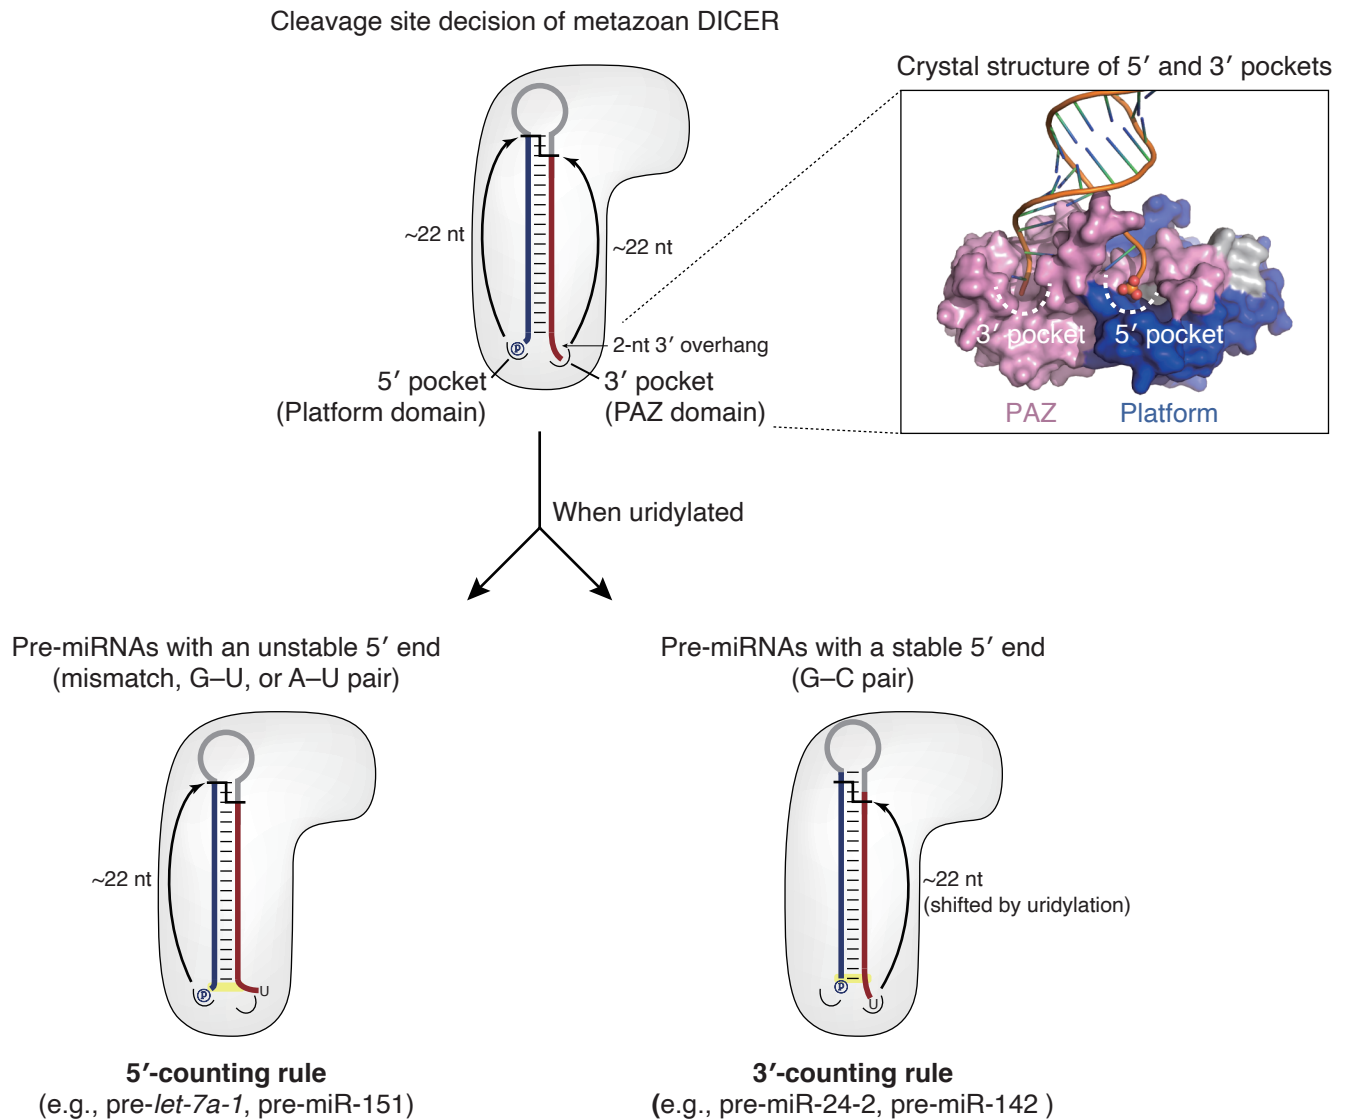

**Figure S3, related to Figure 3 | DICER has been known to decide the cleavage site by measuring ~22 nt from the 5' or 3' ends.**

In the crystal structure, the platform domain and the PAZ domain are colored in blue and pink, respectively (Protein Data Bank (PDB) ID 4NH5) (Tian et al., 2014).

## MicroRNA arm switching regulated by uridylation

### A Structural model with human DICER and pre-miR-324

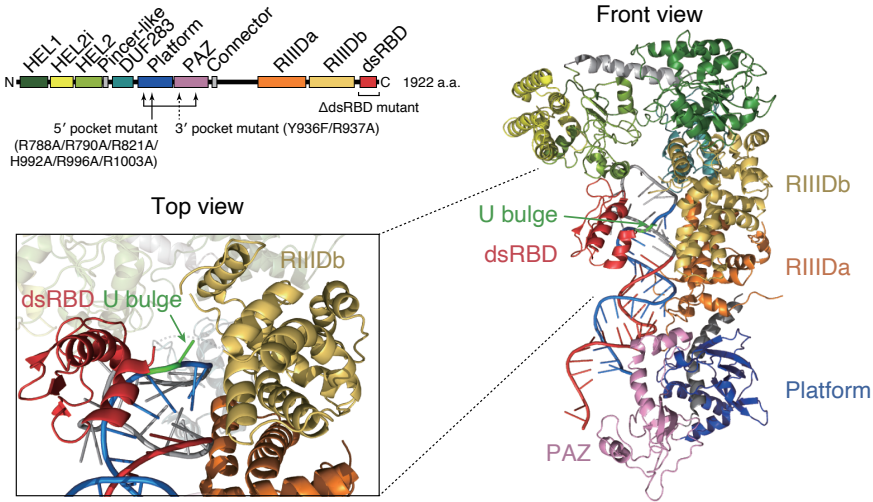

### B sRNA-seq from *Dicer*-null mESC rescued with DICER WT or 5' pocket mutant

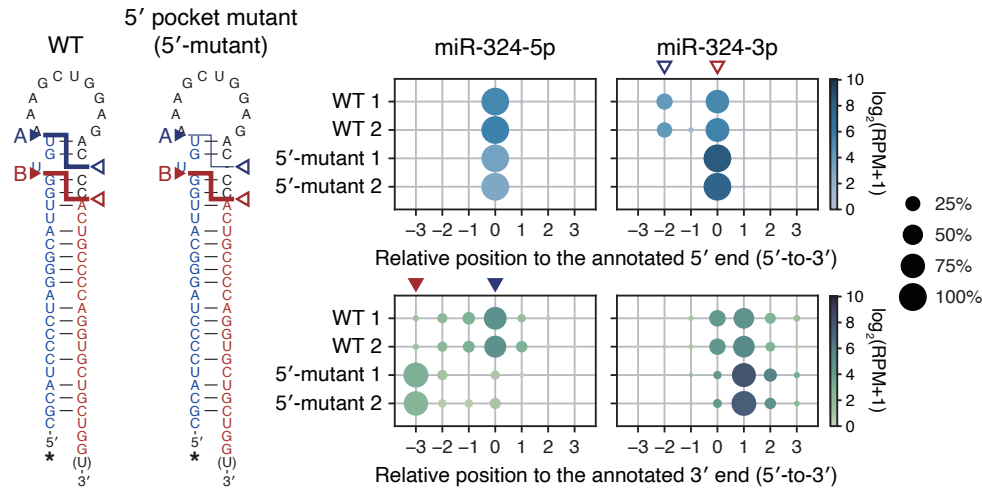

### C *In vitro* DICER processing of "no-bulge" pre-mir-324 mutant in the presence of TRBP

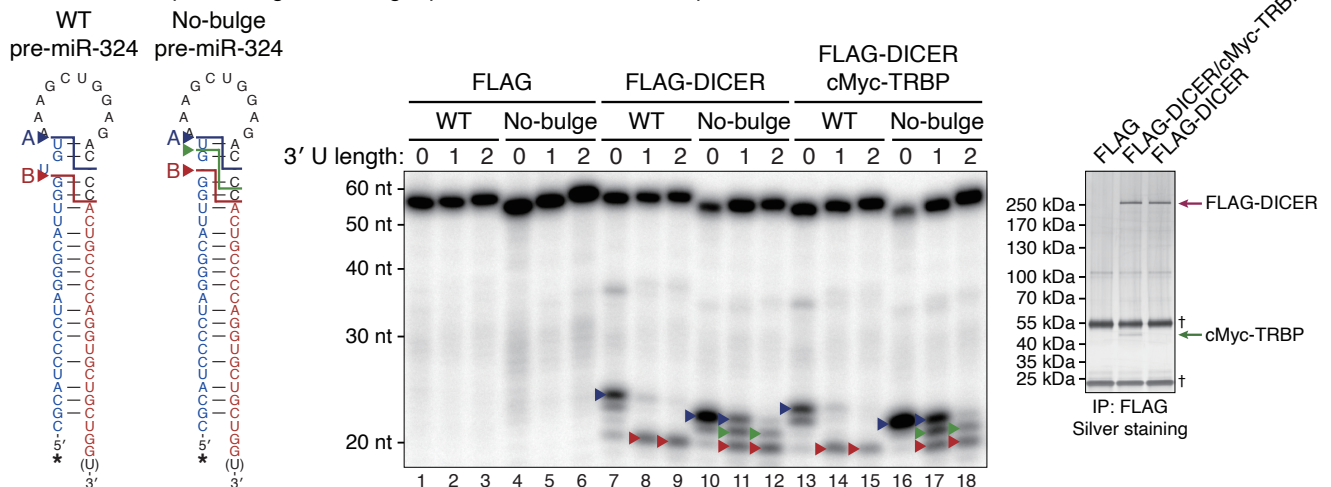

## MicroRNA arm switching regulated by uridylation

---

### **Figure S4, related to Figure 4 | Alternative DICER processing site is not dependent on the 5'-counting rule but dictated by the U bulge structure of pre-miR-324. (previous page)**

**(A)** The structural model of human DICER and pre-miR-324. The orientation of unmodified pre-miR-324 on human DICER was modeled, based on the crystal structure of double-stranded RNA-bound *Aquifex aeolicus* (Aa) RNase III (Gan et al., 2006; Liu et al., 2018). The DICER dsRBD was then superimposed with that of Aa RNase III to predict its position in a dicing state. The U bulge of pre-miR-324 is in the vicinity of RIIIDb in the model. HEL1, HEL2i, and HEL2 in the DExD/H-box helicase domain in green, lemon, and yellow-green, respectively; the DUF283 domain in cyan; the platform domain in blue, the PAZ domain in pink; RIIIDa and RIIIDb, the RNase IIIa and RNase IIIb domains in orange and yellow, respectively; dsRBD, the double-stranded RNA binding domain in red. **(B)** The usage of the indicated 5' and 3' ends of miR-324 in the *Dicer*-null mouse embryonic stem cells (mESCs) rescued with wild type or 5' pocket mutant DICER. The 5' and 3' ends of human miR-324 annotated in miRBase release 21 were used as references. Cleavage sites and their corresponding positions on miR-324 are marked with arrowheads. RPM, reads per million. **(C)** Left: *In vitro* processing of wild type or no-bulge mutant pre-miR-324 by immunopurified DICER along with co-immunoprecipitated TRBP. Lanes 1–12 (FLAG and FLAG-DICER) are identical with those in Figure 4A. Major cleavage products and their corresponding cleavage sites are marked with arrowheads. \*, radiolabeled 5' phosphates. Right: Immunopurified proteins analyzed by silver staining. †, heavy and light chains of anti-FLAG antibodies.

## MicroRNA arm switching regulated by uridylation

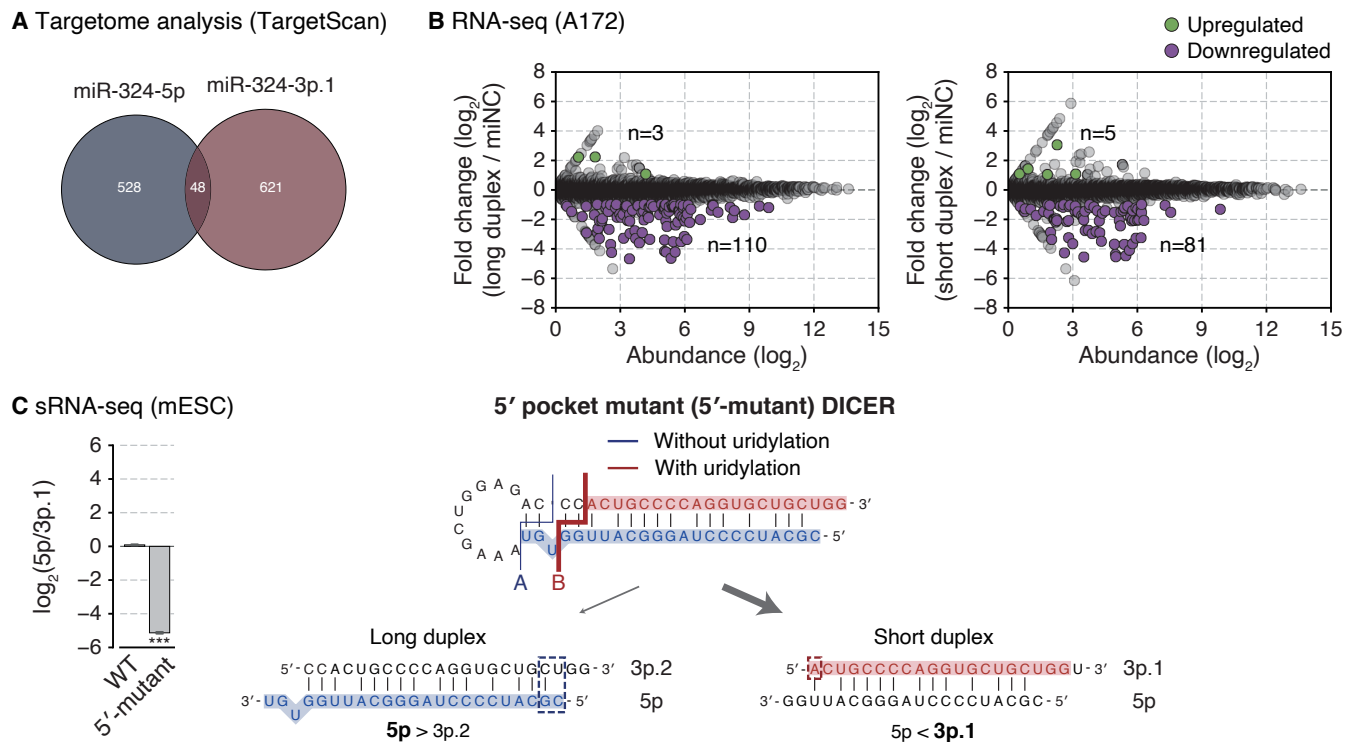

### Figure S5, related to Figure 5 | Alternative DICER processing is responsible for the arm switching.

**(A)** Targetome analysis of miR-324-5p and 3p. Among the genes expressed in A172, targets were predicted by TargetScan. **(B)** Gene expression changes upon transfection of miR-324 duplexes in A172. Differentially expressed genes ( $p$ -value < 0.001 by edgeR (Robinson et al., 2010)) with  $\log_2$ -transformed fold change > 1 or < -1 were indicated with green or purple dots, respectively. **(C)** Strand selection of miR-324 in the *Dicer*-null mESCs replenished with wild type or 5' pocket mutant DICER. Left: The miR-324-5p/3p.1 ratio detected by sRNA-seq. Bars indicate mean  $\pm$  s.d. ( $n = 2$ , biological replicates). \*\*\* $p < 0.001$  by the two-sided Student's  $t$  test. Right: A schematic diagram of strand selection of miR-324 duplexes generated from the processing by 5' pocket mutant DICER (Figures 4B and S4B).



## MicroRNA arm switching regulated by uridylation

### A Gene expression analysis (REMBRANDT)

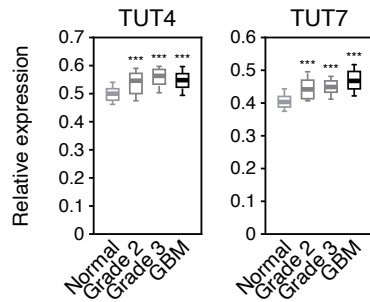

### B Microarray

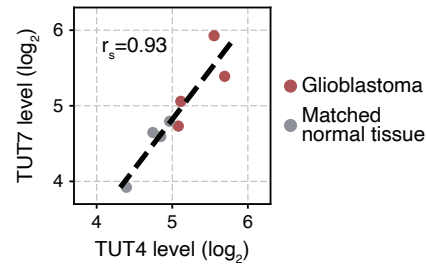

### C Survival analysis

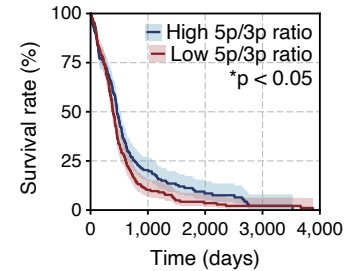

### D Cellular effect of alteration of miR-324 strand ratio (A172)

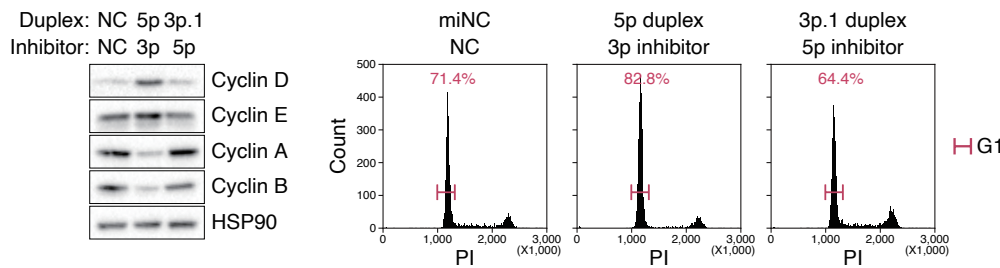

### E Cellular effect of alteration of miR-324 strand ratio (U87MG)

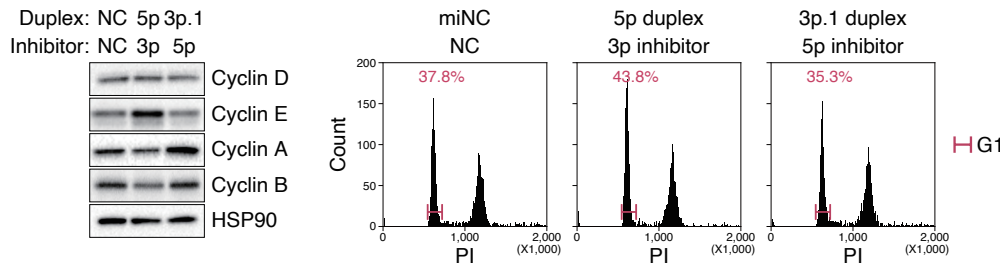

### F Cellular effect of TUT4/7 depletion (U87MG)

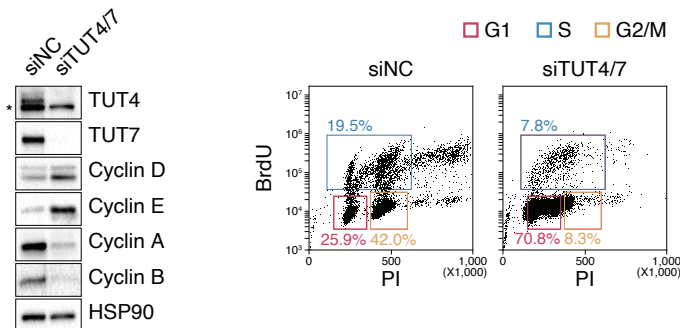

### G Cellular effect of TUT4/7 depletion (tumorsphere)

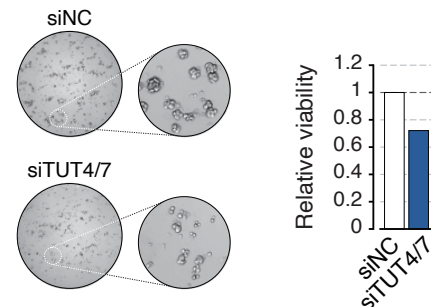

**Figure S6, related to Figure 6 | Perturbation of the miR-324 arm usage in glioblastoma suppresses cell cycle progression.**

(continued on the next page)

## MicroRNA arm switching regulated by uridylation

---

**Figure S6** (*previous page*) | **(A)** Expression levels of TUT4/7 in normal, lower grade glioma, and glioblastoma tissues from the REMBRANDT database. Normal, n = 28; grade 2, n = 65; grade 3, n = 58; glioblastoma, n = 228. \*\*\*p < 0.001 by one-way ANOVA with Tukey's post hoc test for multiple comparisons. **(B)** Positive correlation between TUT4 and TUT7 expression levels detected in the microarray in glioblastoma and matched normal brain tissues. The linear regression is shown with a dashed line.  $r_s$ , Spearman correlation coefficient. **(C)** The Kaplan-Meier survival curve stratified by high (n = 228) or low (n = 228) miR-324-5p/3p ratio of TCGA glioblastoma. Shades represent a 95% confidence interval. \*p < 0.05 by the two-sided log-rank test. **(D–E)** Western blot of indicated cyclin proteins and cell cycle profile after disrupting the functional strand ratio of miR-324 in A172 (D) or in U87MG (E). **(F)** Western blot of indicated proteins and cell cycle after knocking down TUT4/7 in U87MG. \*, a cross-reacting band. **(G)** Cell viability measured by the MTT assay after knocking down TUT4/7 in patient-derived glioblastoma tumorsphere (TS13-64). PI, propidium iodide. BrdU, bromodeoxyuridine.

## MicroRNA arm switching regulated by uridylation

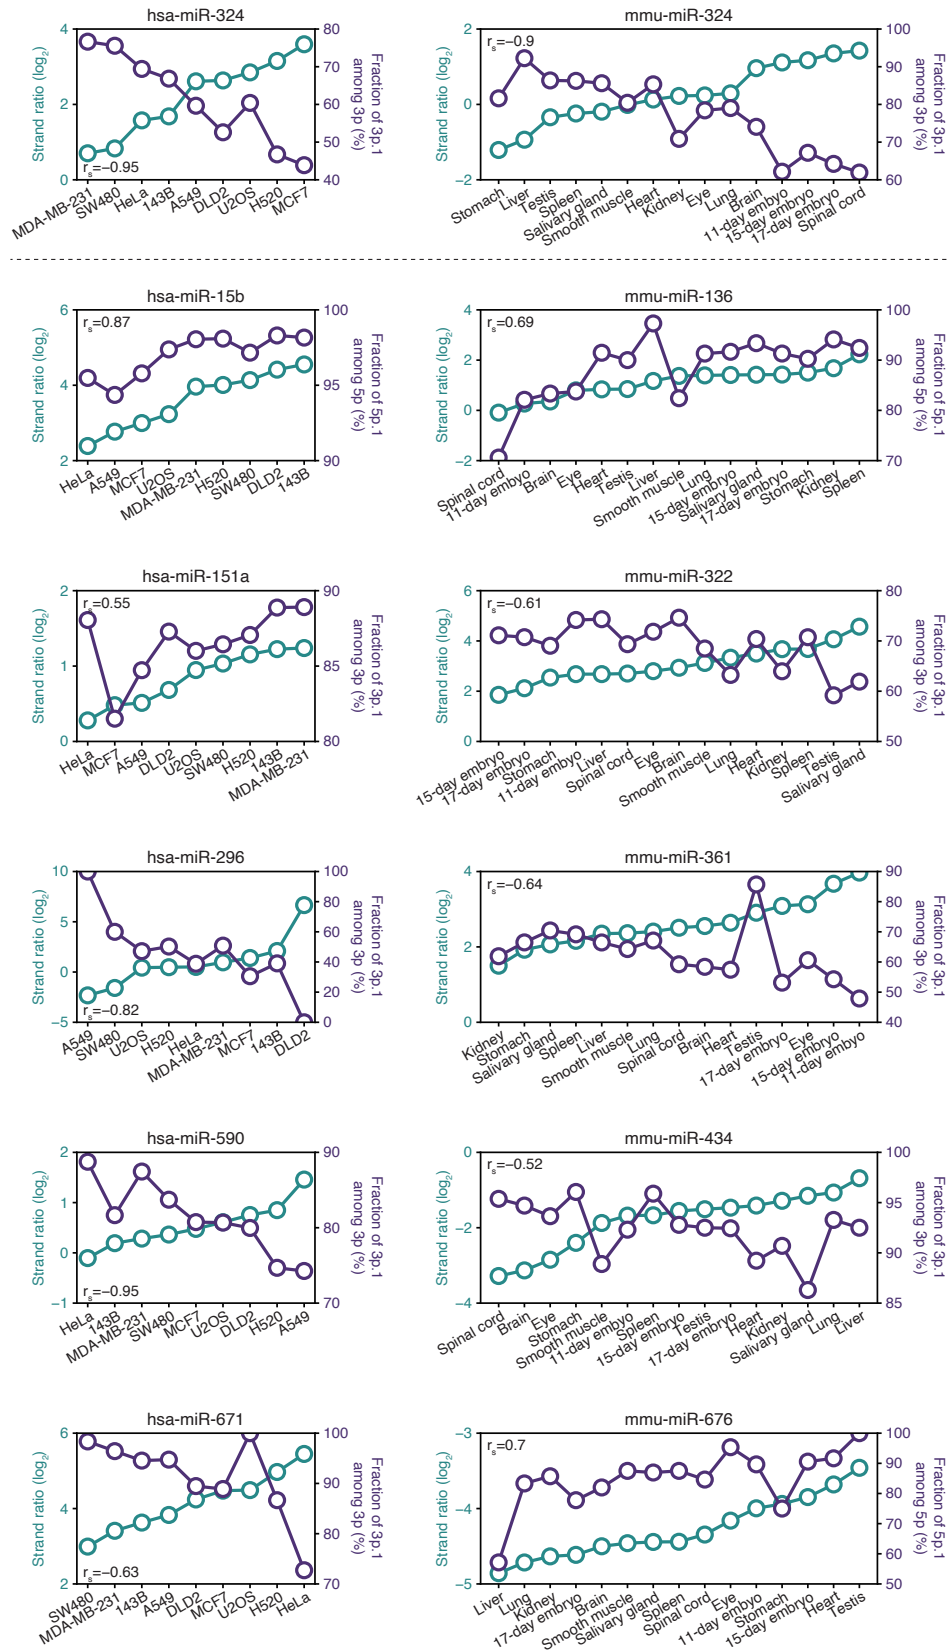

## MicroRNA arm switching regulated by uridylation

---

### **Figure S7 | Strand ratios and 5'-isomiR fractions of many miRNAs change simultaneously depending on cell types. (previous page)**

Scatter plots of the  $\log_2$ -transformed 5p/3p ratio of the most abundant 5'-isomiRs (cyan) and the fraction of the most abundant 5'-isomiRs among the indicated strand (purple).
